# 1 **Chromosomal barcoding of *E. coli* populations reveals lineage** 2 **diversity dynamics at high resolution**

3  
4 Jesse Lerner<sup>1,4</sup>, Michael Manhart<sup>2,4</sup>, Weronika Jasinska<sup>1</sup>, Louis Gauthier<sup>3</sup>,  
5 Adrian W.R. Serohijos<sup>3</sup> & Shimon Bershtein<sup>1,\*</sup>

6  
7 <sup>1</sup>Department of Life Sciences, Ben-Gurion University of the Negev, Beer-Sheva, Israel.

8 <sup>2</sup>Department of Chemistry and Chemical Biology, Harvard University, Cambridge, MA, USA and Institute  
9 of Integrative Biology, ETH Zurich, Zurich, Switzerland.

10 <sup>3</sup>Department of Biochemistry, University of Montreal, Montreal, Quebec, Canada.

11 <sup>4</sup>These authors contributed equally: Jesse Lerner, Michael Manhart

12 \*e-mail: shimonb@bgu.ac.il  
13  
14

15 Evolutionary dynamics in large asexual populations is strongly influenced by multiple  
16 competing beneficial lineages, most of which segregate at very low frequencies. However,  
17 technical barriers to tracking a large number of these rare lineages have so far prevented a  
18 detailed elucidation of evolutionary dynamics in large bacterial populations. Here, we  
19 overcome this hurdle by developing a chromosomal barcoding technique that allows  
20 simultaneous tracking of ~450,000 distinct lineages in *E. coli*. We used this technique to  
21 gather insights into the evolutionary dynamics of large ( $>10^7$  cells) *E. coli* populations  
22 propagated for ~420 generations in the presence of sub-inhibitory concentrations of  
23 common antibiotics. By deep sequencing the barcodes, we reconstructed trajectories of  
24 individual lineages at high frequency resolution ( $< 10^{-5}$ ). Using quantitative tools from  
25 ecology, we found that populations lost lineage diversity at distinct rates corresponding to  
26 their antibiotic regimen. Additionally, by quantifying the reproducibility of these dynamics  
27 across replicate populations, we found that some lineages had similar fates over  
28 independent experiments. Combined with an analysis of individual lineage trajectories,  
29 these results suggest how standing genetic variation and new mutations may contribute to  
30 adaptation to sub-inhibitory antibiotic levels. Altogether, our results demonstrate the power  
31 of high-resolution barcoding in studying the dynamics of bacterial evolution.

32

33

34

35

36

37

38

1 Advances in sequencing technologies have generated tremendous breakthroughs in  
2 identification of beneficial mutations arising in controlled laboratory evolution  
3 experiments, as well as mutations contributing to the emergence of anti-cancer or anti-  
4 bacterial drug resistance in the clinic<sup>1-4</sup>. Yet, experimental measurements of the *dynamics*  
5 of evolutionary processes remains a major challenge, particularly in large asexual  
6 populations, where multiple low-frequency small-effect mutations are known to spread  
7 simultaneously<sup>5-8</sup>. A quantitative description of evolutionary dynamics requires the ability  
8 to follow numerous individual lineages, most of which occur at extremely low frequency  
9 ( $10^{-5}$ - $10^{-6}$ ), and to do so in parallel and over multiple generations. Whole genome  
10 sequencing (WGS) techniques, although becoming routine and well-established, fall short  
11 of fulfilling this requirement, as they are usually unable to detect mutations at frequencies  
12 below  $\sim 0.1\%$ <sup>9,10</sup>. Various alternative solutions have been applied over the years to  
13 reconstruct population dynamics from trajectories of individual lineages at much higher  
14 resolution than accessed by WSG<sup>11-13</sup>. A particularly successful method that dramatically  
15 increases the frequency resolution of individual lineages is based on uniquely tagging  
16 chromosomes of individual cells with a genetic “barcode” that can be easily recovered by  
17 deep sequencing<sup>14</sup>. This approach was implemented in *S. cerevisiae*, where chromosomal  
18 insertion of  $\sim 500,000$  random barcodes using the *Cre-loxP* recombination system allowed  
19 a quantitative description of evolutionary dynamics of yeast populations ( $\sim 10^8$  cells)<sup>5,15,16</sup>.  
20 In bacteria, however, technical barriers have limited the number of uniquely-incorporated  
21 chromosomal barcodes to  $\sim 100$ - $400$ <sup>17-19</sup>. Such low levels of barcode diversity preclude us  
22 from answering important questions in bacterial evolution. For instance, highly-efficient  
23 chromosomal labeling is particularly relevant in characterizing the evolution of drug  
24 resistance in the presence of sub-inhibitory amounts of antibiotics, where the dynamics is  
25 driven by multiple mutations of low frequency and small fitness effects<sup>20</sup>.

26 Here, we present a method based on the Tn7 transposon to generate *E. coli*  
27 populations of  $> 10^7$  cells carrying  $10^5$ - $10^6$  unique chromosomal barcodes. We  
28 demonstrate its implementation by quantifying the dynamics and patterns of lineage  
29 diversity loss in barcoded populations propagated in a month-long experiment ( $\sim 420$   
30 generations) in the presence of sub-inhibitory concentrations of two commonly applied  
31 antibiotics, chloramphenicol and trimethoprim. We found that different selection regimes  
32 elicited unique lineage diversity dynamics. By comparing the identity of individual

1 barcodes in independent replicates evolving in parallel under identical conditions, we were  
2 also able to infer the relative contributions of pre-existing versus *de novo* mutations to the  
3 observed evolutionary dynamics. In general, stronger selection pressure generated faster  
4 loss of lineage diversity and more reproducible dynamics driven by standing genetic  
5 variation. In contrast, weaker selection pressure produced slower diversity loss and less  
6 reproducible dynamics due to a greater role of new mutations. In particular, ultra-low  
7 amounts of trimethoprim (0.01 µg/ml that amounts to 0.1% of minimal inhibitory  
8 concentration (MIC)) unexpectedly slowed the rate of lineage diversity loss even beyond  
9 conditions without any antibiotic, hinting the possibility that in this regime the antibiotic  
10 could be primarily functioning as a signaling molecule<sup>21,22</sup>.

11

## 12 **Results**

13 **Highly efficient chromosomal barcoding of *E. coli* cells.** Several robust genome-editing  
14 methods available for *E. coli* have long made this organism a flagship of genetic  
15 manipulations<sup>23</sup>. A high-resolution chromosomal labeling technique, however, has not  
16 been available, making it difficult to analyze the evolutionary dynamics of large bacterial  
17 populations segregating at low frequencies. To address this problem, we harnessed the  
18 well-established site-specific recombination machinery of the Tn7 transposon<sup>24,25</sup>. We  
19 placed the *tnsABCD* genes that encode the transposase biochemical machinery under the  
20 control of an arabinose-inducible pBAD promoter in a temperature-sensitive helper  
21 plasmid (**Fig. 1A**). The Tn7 arms (Tn7L, Tn7R) that target the genetic cargo at a neutral  
22 *attnTn7* attachment site were relocated to a suicide integration plasmid (**Fig. 1B**). We  
23 placed the barcode cassette carrying a 15-nucleotide long random sequence (the “barcode”)  
24 and the adjacent marker of selection between the Tn7 arms on the integration plasmid (**Fig.**  
25 **1B,C**). To minimize the preparation of barcode libraries to two consecutive PCR reactions,  
26 we added sequences complementary to Illumina adapter primers flanking the barcode  
27 cassette (**Fig. 1C**). These sequences were used to both PCR amplify barcodes directly from  
28 cell cultures as well as anchor i5/i7 Illumina indexes to the amplified barcodes (**Methods**).  
29 Using this binary Tn7 transposon system, we integrated barcodes into a fixed location on  
30 the *E. coli* chromosome in two steps. First, we transformed cells with the Tn7 helper  
31 plasmid and pre-conditioned them by inducing the transposase machinery. Second, we  
32 transformed the pre-conditioned cells with the barcoded integration plasmid.

1  
2  
3  
4  
5  
6  
7  
8  
9  
10  
11  
12  
13  
14  
15  
16  
17  
18  
19  
20  
21  
22  
23  
24  
25  
26  
27  
28  
29  
30  
31  
32  
33  
34  
35  
36  
37  
38  
39  
40  
41  
42  
43  
44  
45  
46  
47  
48  
49  
50

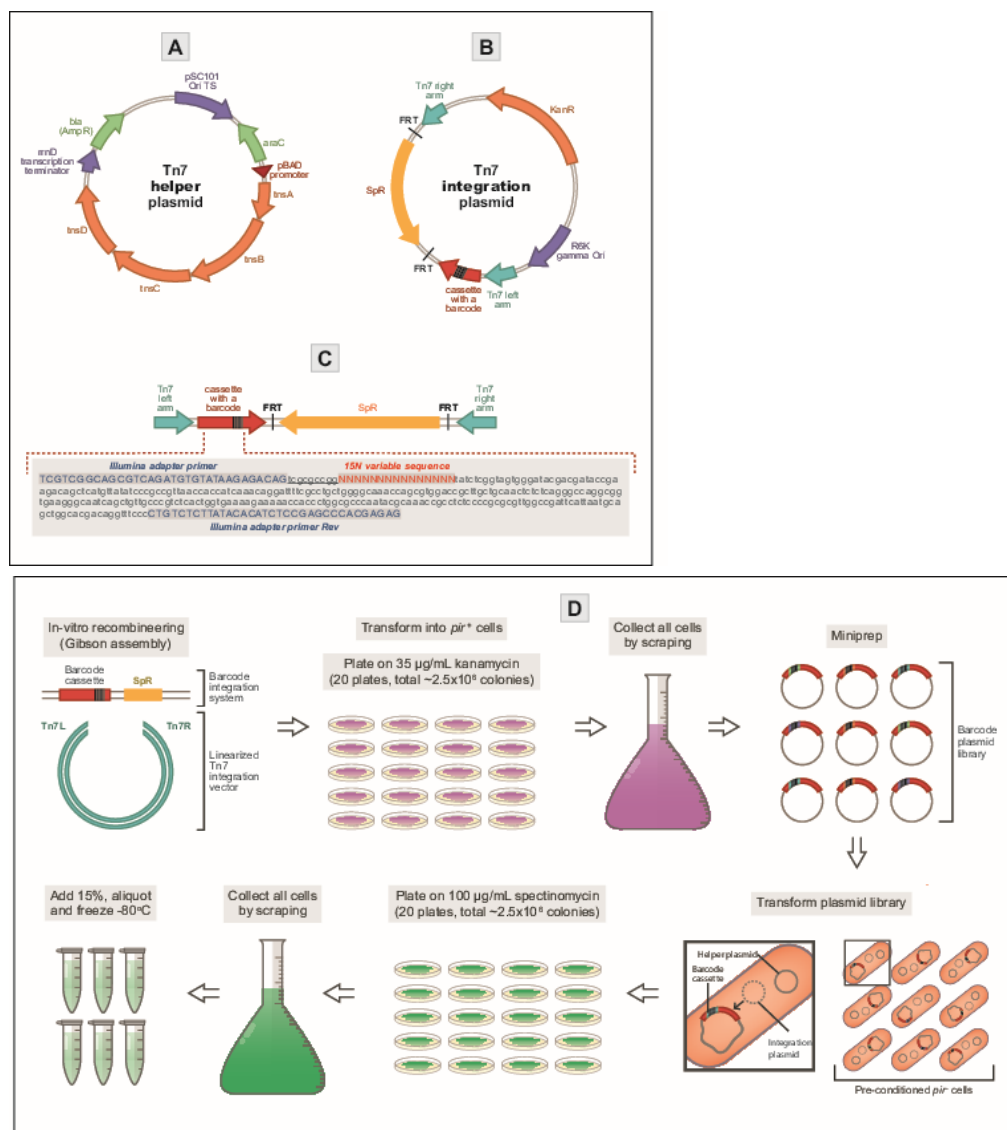

**Figure 1: Barcoding *E. coli* cells with Tn7 transposon machinery.** (A) Map of the helper plasmid expressing the Tn7 transposition machinery (*tnsABCD*) under the control of a pBAD promoter. Using a temperature-sensitive origin of replication (PSC101 Ori ts), we cure the plasmid by growing the strains at a non-permissive temperature after the chromosomal integration of barcodes is complete. (B) Map of a suicidal integration plasmid carrying the barcode cassette and spectinomycin resistance-conferring gene (SpR) nested between the left and right Tn7 arms. The SpR gene is flanked by FRT sites and can be later excised from the chromosome with FliP recombinase. The *pir*<sup>+</sup> dependent origin of replication (R6K gamma Ori) renders this plasmid suicidal in *pir*<sup>-</sup> cells. (C) A map of the segment undergoing chromosomal integration into the Tn7 attachment site (*atnTn7*). Inset: sequence of the barcode-carrying cassette. The 5' and 3' ends are flanked by sequences complementary to the Illumina adapter primers (upper case, blue) (see also **Methods**). The location of the 15 nt variable region (the barcode) is marked with uppercase red Ns. The barcode is placed upstream of a 9 nt stretch (underlined, lowercase). The barcode is the only variable part of the cassette. (D) Preparation of the barcoded plasmid and chromosomal libraries. We incorporate the cassettes carrying unique barcodes into Tn7 integration plasmids using Gibson assembly and then transform them into *pir*<sup>+</sup> cells. We achieve the chromosomal incorporation of the barcodes and curing of the Tn7 helper plasmids in a single plating step on spectinomycin at 37 °C (see also **Methods**).

1 We simultaneously selected for chromosomal barcode integration and removal of the  
2 helper plasmid by plating on selective media and incubating the plates at 37°C (**Fig. 1D**,  
3 **Methods**). Sequencing the ‘raw’ barcode library – as synthesized by the manufacturer and  
4 prior to incorporation of barcode cassettes into the integration plasmid (**Methods**) –  
5 revealed that the total number of unique barcodes was  $\sim 1.3 \times 10^6$  (**Table S1**). The ‘raw’  
6 library had a fairly uniform distribution of frequencies: all barcodes but one had  
7 frequencies between  $10^{-7}$  and  $10^{-5}$  (**Fig. S1A,B**). The nucleotide composition of these  
8 barcodes was also very close to random, as quantified by the entropy of nucleotides per  
9 position (**Fig. S1C**). Incorporating the barcodes onto plasmids and then onto chromosomes  
10 reduced this diversity ( $\sim 8.4 \times 10^5$  unique barcodes on plasmids and  $\sim 4.5 \times 10^5$  on  
11 chromosomes; **Table S1**). The process also introduced more redundancy into the  
12 distribution of frequencies, with some barcodes reaching frequencies of  $10^{-3}$  (**Fig. S1A,B**).  
13 These increases in redundancy also led to a minor decrease in sequence entropy (**Fig. S1C**).  
14 However, the presence of a few barcodes with high initial frequencies did not appear to  
15 play a major role in the resulting lineage dynamics during evolution, as we show below.

16

17 **Laboratory evolution of the barcoded population.** Bacteria are often exposed to  
18 antibiotic concentrations far below the minimal inhibitory concentration (MIC), both in  
19 natural environments and in patients receiving antimicrobial therapy<sup>26,27</sup>. Previous studies  
20 have shown that, compared to a lethal dosage, sub-MIC concentrations greatly expand the  
21 mutational space by allowing a large number of small-effect mutations to enter a population  
22 simultaneously<sup>21</sup>. The importance of low-frequency lineages in sub-MIC conditions make  
23 them a perfect setting to employ our barcoded population of *E. coli*. To this end, we chose  
24 two common antibiotics with distinct modes of actions: chloramphenicol (CMP), which  
25 inhibits protein synthesis via inactivation of peptidyl transferase activity of bacterial  
26 ribosome<sup>28</sup>; and trimethoprim (TMP), which functions as a competitive inhibitor of the  
27 essential protein dihydrofolate reductase<sup>29</sup>. It was demonstrated that sub-inhibitory  
28 concentrations of antibiotics as low as MIC/100 can still select for resistant mutants over  
29 the wild type<sup>30</sup>. Thus, to track the dynamics of adaptations at sub-MIC concentrations we  
30 chose antibiotic concentrations around MIC/100. To reduce the selection pressure even  
31 further, below the minimal selective concentration, we also chose ultra-sub-MIC  
32 concentrations ( $\sim$ MIC/1000). To fine-tune the sub-MIC concentrations of both antibiotics

1 to the conditions of the laboratory evolution experiment, we identified concentrations that  
2 reduced the total number of cells by no more than 30% by the end of a single propagation  
3 cycle (~10 hours), comparatively to the untreated culture (**Methods**). These concentrations  
4 were 1  $\mu\text{g}/\text{mL}$  CMP (6.25% MIC) and 0.1  $\mu\text{g}/\text{mL}$  TMP (1% MIC) (**Fig. S2, Methods**). For  
5 ultra-sub-inhibitory regime, we chose 10% of the aforementioned concentrations. We then  
6 conducted laboratory evolution via serial passaging in the presence of CMP initially at  
7 6.25% ('low') and 0.625% ('ultra-low') MIC, in TMP at 1% ('low') and 0.1% ('ultra-low')  
8 MIC, and in the absence of any antibiotics (**Fig. S3A,B**). We evolved 14 independent  
9 replicate populations in each of these five conditions (**Fig. S3C,D**). We diluted batch  
10 cultures (500  $\mu\text{L}$  each) grown in 96 well plates by 1:100 every ~6 generations (that is,  
11 passing twice daily; **Fig. S3E,F**) with a bottleneck population size of  $\sim 3 \times 10^7$  cells (**Fig.**  
12 **S3C,D**). To sustain the selection pressure along the evolutionary experiment (~420  
13 generations), we gradually increased CMP in the 'low' condition from 1  $\mu\text{g}/\text{mL}$  to 2.8  
14  $\mu\text{g}/\text{mL}$  (**Fig. S3A**); and in the 'low' TMP condition, we increased the antibiotic from 0.1  
15  $\mu\text{g}/\text{mL}$  to 1.2  $\mu\text{g}/\text{mL}$  (**Fig. S3B**). We kept the 'ultra-low' CMP environment constant at  
16 0.1  $\mu\text{g}/\text{mL}$  throughout the experiment (**Fig. S3A**), while 'ultra-low' TMP increased from  
17 0.01  $\mu\text{g}/\text{mL}$  to 0.1  $\mu\text{g}/\text{mL}$  at generation ~288 (**Fig. S3B**). As intended, the number of cells  
18 at the end of each passage remained roughly constant for each condition and along the  
19 entire evolutionary experiment (**Fig. S3C,D**).

20 In the experiment, we expected at least two forms of selective pressure, one due to  
21 the specific type and concentration of antibiotic, and another due to general growth  
22 conditions (growth medium, aeration, etc.). Additionally, there might also be fitness cost  
23 associated with the acquisition of drug resistance<sup>31,32</sup>. To analyze the effects exerted by  
24 these two selection forces, and a possible fitness cost, we measured the fitness of the  
25 barcoded populations at several time points during the experiment. Specifically, due to the  
26 limitation of the number of samples that can be loaded into a single NextSeq run, we chose  
27 a total of 12 randomly picked populations over the five conditions: three replicates for  
28 'low' CMP, three replicates for 'ultra-low' CMP, two replicates for 'low' TMP, two  
29 replicates for 'ultra-low' TMP, and two replicates for 'no drug' condition. We measured  
30 fitness with respect to growth under antibiotics in units of IC50 (antibiotic concentration  
31 inhibiting 50% of growth) at the whole-population level (**Fig. S4, Methods**). These  
32 measurements revealed a moderate increase in antibiotic resistance over the experiment for

1 ‘low’ CMP and TMP conditions (**Fig. S5A,B**). In contrast, both ‘ultra-low’ conditions  
2 produced no measurable improvement in IC<sub>50</sub> (**Fig. S5A,B**).

3 Furthermore, the increases in drug resistance evolved in the ‘low’ conditions were  
4 accompanied by a fitness cost in the absence of antibiotics, measured by the growth rate  
5 (**Fig. S5C,D**). In particular, the population that evolved to resist the highest levels of CMP  
6 (‘low’ CMP replicate 1, **Fig. S5A**) showed the strongest fitness cost among the three  
7 replicate populations in the same condition (**Fig. S5C**). However, we observed no fitness  
8 cost in the populations evolved under ‘ultra-low’ CMP. Instead, the growth rate trajectories  
9 for these populations were generally similar to those for the populations that evolved in the  
10 absence of antibiotics (**Fig. S5C**). Surprisingly, in the populations evolved under ‘ultra-  
11 low’ TMP, the improvement in growth rate lagged behind the populations evolved under  
12 no antibiotics (**Fig. S5D**), suggesting that the rate of adaptation to growth conditions at  
13 0.1% MIC of TMP was diminished, despite the fact that no improvement in TMP IC<sub>50</sub> was  
14 observed (**Fig. S5B**).

15

16 **Barcodes allow high-resolution monitoring of lineage trajectories.** To elucidate the  
17 evolutionary dynamics of these populations at the level of individual lineages, we  
18 sequenced the barcodes of the same 12 populations at 16 time points. From the sequenced  
19 barcodes we assembled frequency trajectories for all  $\sim 4.5 \times 10^5$  initial lineages over the  
20 course of the experiment (**Figs. 2, S6**). These trajectories immediately raised several  
21 important qualitative insights. First, we saw that just one or two lineages dominate each  
22 population ( $> 85\%$ ) by the end of the experiment (see also **Table S2**). Second, some  
23 lineages rose to high frequency in several independent populations (lineage colors match  
24 across panels in **Fig. 2**). Third, we saw evidence of widespread clonal interference: some  
25 lineages that initially increased in frequency due to positive selection later decreased due  
26 to competition from fitter lineages. Furthermore, **Fig. 2** suggests that the rate of lineage  
27 diversity loss was reproducible between replicate populations in the same condition, while  
28 systematically distinct across different conditions. Although genetic drift alone can cause  
29 a drop in lineage diversity, this occurs on the time scale of  $2N$  generations, where  $N$  is the  
30 effective population size<sup>33</sup>. Since the effective population size in our experiments was of  
31 order  $10^7$  (**Fig. S3C,D**), neutral dynamics at the scale of the whole population was

1 negligible on the time scale of the experiment. Therefore, we could assume that the  
2 dynamics of lineage diversity was dominated by selection.

3

#### 4 **Ecological tools allow quantification of lineage diversity dynamics across conditions.**

5 To quantify the dynamics of lineage diversity, we adopted a measure of diversity widely  
6 used in ecological studies<sup>34,35</sup>:

7

$$\text{Diversity index } {}^qD = \left( \sum_{\text{lineage } k} x_k^q \right)^{1/(1-q)}, \quad (1)$$

8 where  $x_k$  is the frequency of the  $k^{\text{th}}$  barcoded lineage, and  $q$  is the “order” of the diversity  
9 index, which determines the sensitivity of diversity to abundant versus rare barcodes  
10 (**Methods**). In general, we can interpret the diversity index as the *effective* number of  
11 lineages present in the population. When  $q = 0$ , the diversity index simply counts the  
12 number of unique barcoded lineages, irrespective of their frequencies. This regime is  
13 equivalent to measuring diversity as “species richness” in ecological contexts<sup>34</sup>. When  $q =$   
14 1, the diversity index weighs all barcoded lineages by their frequency. This regime is  
15 equivalent to the exponential of the Shannon entropy of the frequencies. In the limit of  
16  $q \rightarrow \infty$ , the diversity index equals the reciprocal of the maximum lineage frequency,  
17 meaning that it depends only on the most abundant lineage and no others. Thus, by  
18 comparing the lineage diversity index across different  $q$  values, we can estimate the relative  
19 contributions of rare and abundant lineages to that diversity. Note, that if all lineages have  
20 equal frequencies, then the diversity index equals the actual number of lineages for any  
21 value of  $q$ . **Figure 3A** shows the dynamics of the lineage diversity index for each  
22 population over the time of the experiment, for three different values of  $q$ . At the beginning  
23 of the experiment,  ${}^0D \approx 4.5 \times 10^5$ , since that is the total number of unique barcodes.  
24 However, the *effective* number of lineages, accounting for their unequal frequencies (**Fig.**  
25 **S1A,B**), is approximately 10-fold lower,  ${}^1D \approx 4.6 \times 10^4$ . ‘Low’ CMP produced the  
26 fastest collapse of lineage diversity, extinguishing over 90% of unique barcodes in less than  
27 50 generations. This behavior was displayed at all  $q$  values, indicating that rare and  
28 frequent barcodes contributed equally to these dynamics. In contrast, populations under  
29 ‘low’ TMP lost  ${}^0D$  diversity more rapidly compared to ‘ultra-low’ CMP and ‘no drug’



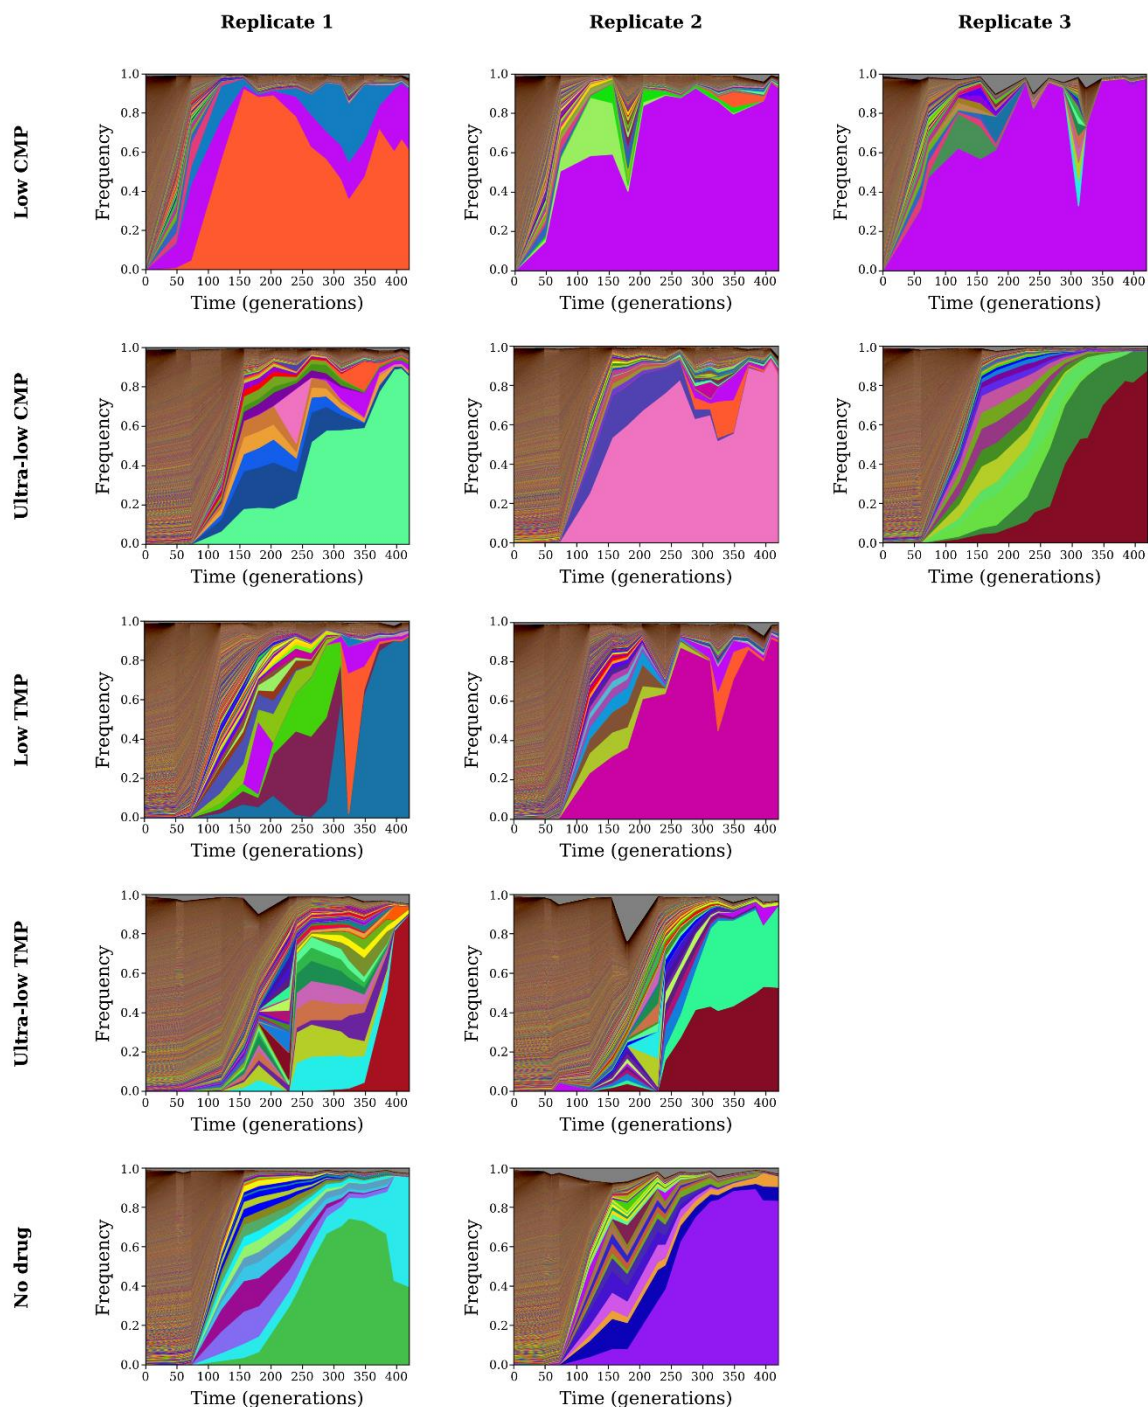

1 **Figure 2: Dynamics of barcoded lineage frequencies over evolution experiment.** Each panel  
2 shows the frequency trajectories for all barcoded lineages in a single population over time of the  
3 experiment. Each colored band corresponds to a unique lineage, with its vertical width indicating  
4 its frequency at a particular time point. The panels in each row correspond to a different antibiotic  
5 regimen, while each column corresponds to a different replicate. For the top 10 (according to  
6 average frequency) lineages in each population, we assign a unique color to each lineage that is  
7 consistent across panels (**Table S2**). We use random colors for all lower-frequency lineages, while  
8 gray represents the frequency of reads without identified barcodes.

9

10

1 conditions, although it lost  ${}^1D$  and  ${}^\infty D$  diversities at approximately the same rate; this  
 2 indicates that the dynamics of abundant lineages were similar in these three conditions, but  
 3 that low-frequency lineages disappeared more quickly in ‘low’ TMP. More surprising was  
 4 the fact that populations under ‘ultra-low’ TMP lost diversity even more slowly than did  
 5 populations under no antibiotics. Indeed, the diversity of populations under ‘ultra-low’  
 6 TMP maintained 40-50% of the initial effective diversity ( $q = 1$ ) up to generation  $\sim 120$ ,  
 7 whereas populations without antibiotics had only 1% of their initial diversity by that time  
 8 point. This difference in the rates of lineage diversity deterioration between ‘ultra-low’  
 9 TMP and ‘no drug’ conditions is consistent with our fitness cost measurements, wherein  
 10 the rate of adaptation under ‘ultra-low’ TMP lagged behind that of ‘no drug’ populations  
 11 (Fig. S5D). Interestingly,  $q = 0$  diversity under ‘ultra-low’ TMP is similar to the other  
 12 populations by generation  $\sim 250$ , but its diversity at larger  $q$  remains higher until the very

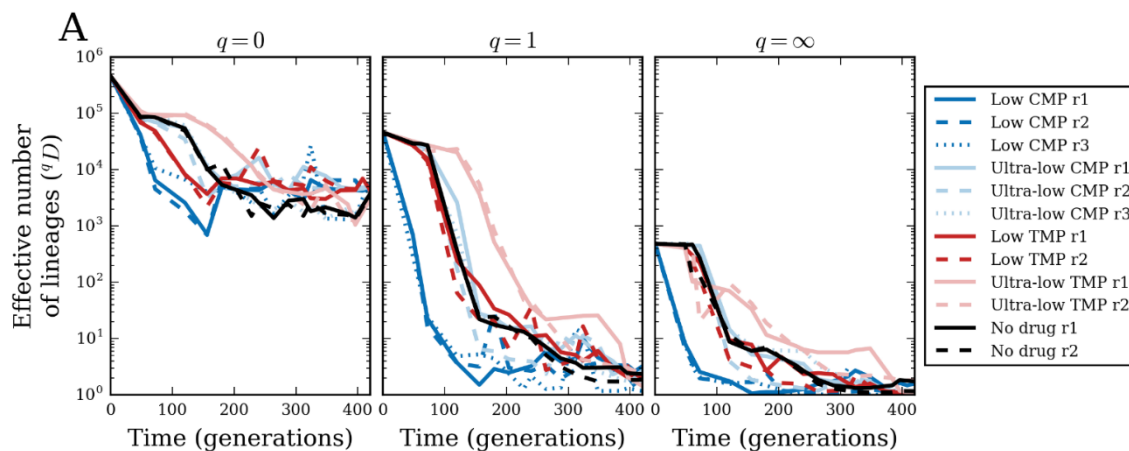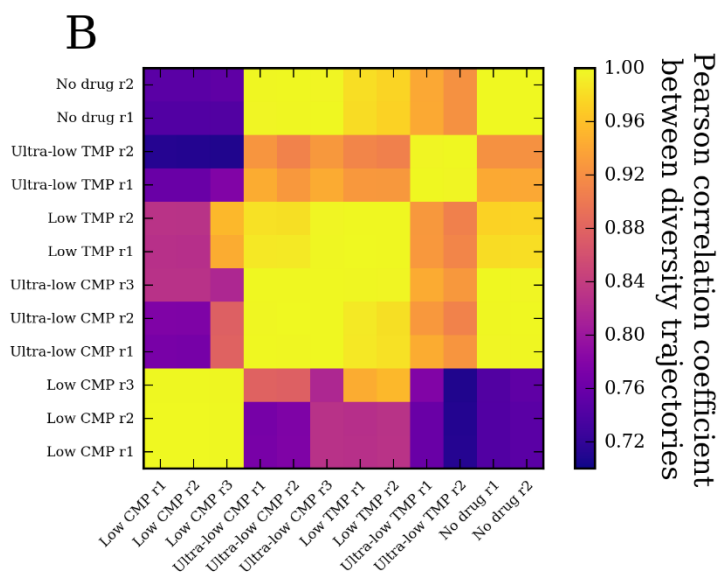

**Figure 3: Dynamics of lineage diversity over time.** We measure diversity of barcoded lineages using the index  ${}^qD$  (Eq. 1, Methods), where the parameter  $q$  controls the weight of low- versus high-frequency lineages: (A)  ${}^qD$  for  $q = 0$  (number of unique barcodes),  $q = 1$  (exponential of Shannon entropy of lineage frequencies), and  $q = \infty$  (reciprocal of the maximum lineage frequency). (B) Pearson correlation coefficient between diversity trajectories ( ${}^1D$ ) from all pairs of populations.

1 end of the experiment. Towards the end of the experiment, we saw that the effective  
2 diversity of all populations is 1 or 2 lineages ( $q = 1$ ), consistent with the observations from  
3 **Fig. 2**. However, we note that despite the drop in lineage diversity, there was still an ample  
4 number of surviving barcode lineages: each population retained a few thousand barcodes  
5 by the end of the experiment, as seen in the  $q = 0$  diversity (**Fig. 3A**).

6

7 **Reproducibility of individual lineage dynamics.** Not only did different antibiotic  
8 regimens produced distinct patterns of lineage diversity loss, but we also observed that  
9 these patterns are consistent across replicate populations. In **Fig. 3B** we show that the  
10 Pearson correlation coefficients between the  $q = 1$  diversity trajectories from all pairs of  
11 populations. While all trajectories are somewhat correlated, since they all monotonically  
12 decrease, we saw stronger similarity among trajectories from the same condition. To further  
13 dissect whether individual lineages have similar fates across populations, we must quantify  
14 the similarity between lineage frequencies in different populations.

15 To compare the lineage composition of two or more populations at a single time  
16 point, we used a definition of diversity dissimilarity from ecology. Suppose we have  $M$   
17 populations whose lineage compositions we want to compare. We first calculated the  
18 diversity index (**Eq. 1**) for all populations pooled together,  ${}^qD_{\text{pooled}}$  (**Methods**). We then  
19 calculated the diversity index for each population alone and determined the mean across  
20 all populations,  ${}^qD_{\text{mean}}$  (**Methods**). The ratio of these two quantities, shifted and rescaled,  
21 measures the dissimilarity among lineage compositions<sup>34,35</sup>:

$$22 \quad \text{Diversity dissimilarity index} = \frac{{}^qD_{\text{pooled}} / {}^qD_{\text{mean}} - 1}{M - 1}. \quad (2)$$

23 If the lineage compositions of all populations are identical, then the pooled population has  
24 diversity equal to the mean diversity, and the dissimilarity index equals zero. In contrast,  
25 if the lineage compositions of  $M$  populations have zero overlap, then the pooled population  
26 has diversity  $M$  times greater than that of the mean single population, and the dissimilarity  
27 index equals 1. As with the diversity index, the parameter  $q$  allows us to vary the  
28 importance of low and high-frequency lineages in the dissimilarity index. For  $q = 0$ , the  
29 dissimilarity index measures how many lineages multiple populations have in common,  
30 regardless of their frequencies, while for  $q \rightarrow \infty$ , it compares only the highest-frequency  
31 lineages (**Methods**).

1           In **Fig. 4A** (left panel), we calculated the  $q = 1$  dissimilarity between all pairs of  
2 populations at generation 120. At the beginning of the experiment, the populations were  
3 identical and so the dissimilarity between all pairs of populations was zero. By generation  
4 120, we saw that many pairs of populations from different conditions have already diverged  
5 (dissimilarity close to the maximum value of 1), while pairs of populations from the same  
6 conditions remained more similar (except for ‘low’ TMP). Furthermore, we saw some  
7 similarity even between conditions: populations under the weakest antibiotic pressures  
8 (‘ultra-low’ CMP, ‘ultra-low’ TMP, and ‘no drug’) all maintained similarity between  
9 conditions comparable to their similarity between replicates. However, by the end of the  
10 experiment at generation 420 (**Fig. 4A**, right panel), we saw that most of this similarity  
11 between populations had disappeared. The main exception was ‘low’ CMP, where the three  
12 replicate populations maintained strong similarity. There was also a small amount of  
13 similarity between ‘low’ CMP, ‘ultra-low’ CMP (two out of three replicates), and ‘low’  
14 TMP. In contrast, replicate populations under ‘ultra-low’ TMP and ‘no drug’ showed no  
15 similarity to each other by the end of the experiment. There was also strong similarity  
16 between replicate 3 in ‘ultra-low’ CMP and replicate 2 of ‘ultra-low’ TMP.

17           We could further quantify the reproducibility of lineage dynamics by calculating  
18 diversity dissimilarity among all replicate populations in each condition over time (**Figs.**  
19 **4B**, **S7**). For  $q = 0$ , we saw the dynamics of within-condition dissimilarity were similar  
20 to the dynamics of the diversity indices themselves in **Fig. 3A**. That is, populations under  
21 ‘low’ CMP diverged from each other most rapidly, followed by ‘low’ TMP, then  
22 concurrently by ‘ultra-low’ CMP and ‘no drug’, and, finally, by ‘ultra-low’ TMP diverging  
23 last. Interestingly, we saw all conditions settle at an intermediate amount of 0.8  
24 dissimilarity by the end of the experiment; this value corresponds to having about 20% of  
25 their lineages in common (**Methods**). The dissimilarity index with  $q = 1$ , which accounts  
26 for heterogeneity in lineage frequencies, shows some differences with the  $q = 0$  case that  
27 simply counts barcodes. With  $q = 1$ , ‘low’ CMP populations actually diverged more  
28 slowly from each other than did populations in the other conditions. Moreover, the ‘low’  
29 CMP populations actually reached some maximum level of  $q = 1$  dissimilarity around  
30 generation 150, and then began converging toward more similar lineage compositions. At  
31 the other extreme, ‘ultra-low’ TMP and ‘no drug’ populations reached maximum  
32 dissimilarity by the end of the experiment, while ‘low’ TMP and ‘ultra-low’ CMP

1 populations had an intermediate value of dissimilarity. The dissimilarity index with  $q =$   
 2  $\infty$  shows a similar pattern of rise and fall for ‘low’ CMP populations; since this case  
 3 depends only on the most frequent lineage, it implies that the high level of similarity  
 4 between ‘low’ CMP populations by the end of the experiment was due to them sharing the  
 5 same dominant lineage.

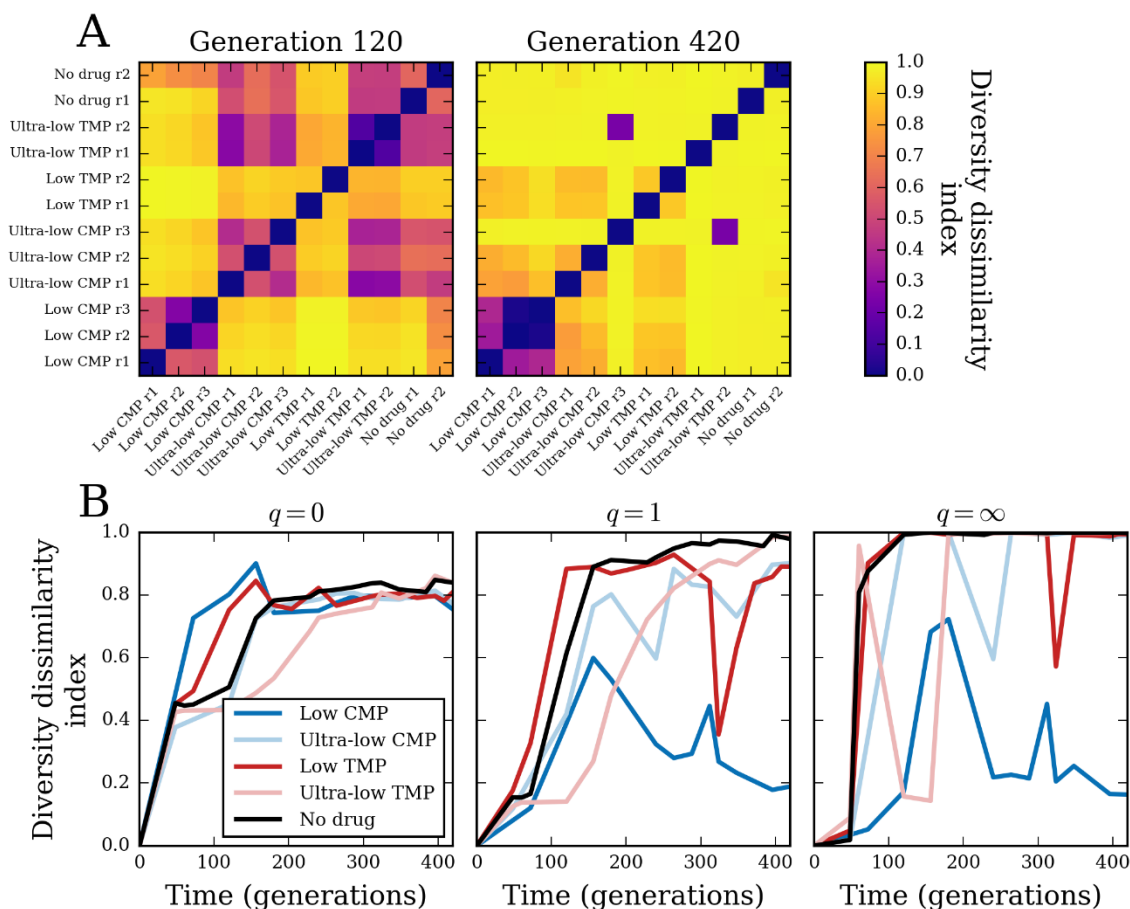

6  
 7 **Figure 4: Dynamics of lineage dissimilarity among populations over time.** (A) Diversity  
 8 dissimilarity index for  $q = 1$  (Eq. 2, Methods) between all pairs of populations at generation 120  
 9 (left) and the final time point at generation 420 (right). (B) Diversity dissimilarity index among all  
 10 replicate populations in each condition, with  $q = 0$ ,  $q = 1$ , and  $q = \infty$ .  
 11

12 Altogether, this analysis shows that lineage dynamics under identical conditions are highly  
 13 reproducible, even at the level of individual lineages. Specifically, it suggests that some  
 14 lineages repeatedly rose to high frequency over multiple experiments. To demonstrate this  
 15 more explicitly, in **Fig. 5A** we compared the frequencies of all barcoded lineages at the end  
 16 of the experiment for two replicate populations in ‘low’ CMP, while in **Fig. 5B** we

1 compared the trajectories for the top three lineages (ranked by average frequency over the  
 2 experiment). Furthermore, in **Fig. 5C** we show the overlap of the top 10 barcodes between  
 3 all three replicate populations in ‘low’ CMP: four of the top 10 in each population are  
 4 shared among all replicates; with three more barcodes shared between two replicates (see  
 5 also **Table S2**). Indeed, the most frequent lineage in replicates 2 and 3 is the exact same  
 6 lineage (see purple trajectories in **Fig. 2**); this lineage is also the second-most frequent  
 7 lineage in replicate 1. In contrast, **Fig. 5D,E,F** shows these same plots for the ‘no drug’  
 8 populations, which have little similarity among their most frequent lineages. In particular,  
 9 they do not share any of their top 10 barcodes (**Fig. 5F, Table S2**). In **Figs. S8, S9** we  
 10 show direct comparisons of lineage frequencies between all pairs of populations. The  
 11 dominant lineages in each population do not appear to have started at unusually high  
 12 frequencies (**Fig. S10**), suggesting another mechanism must explain their dominance.

13

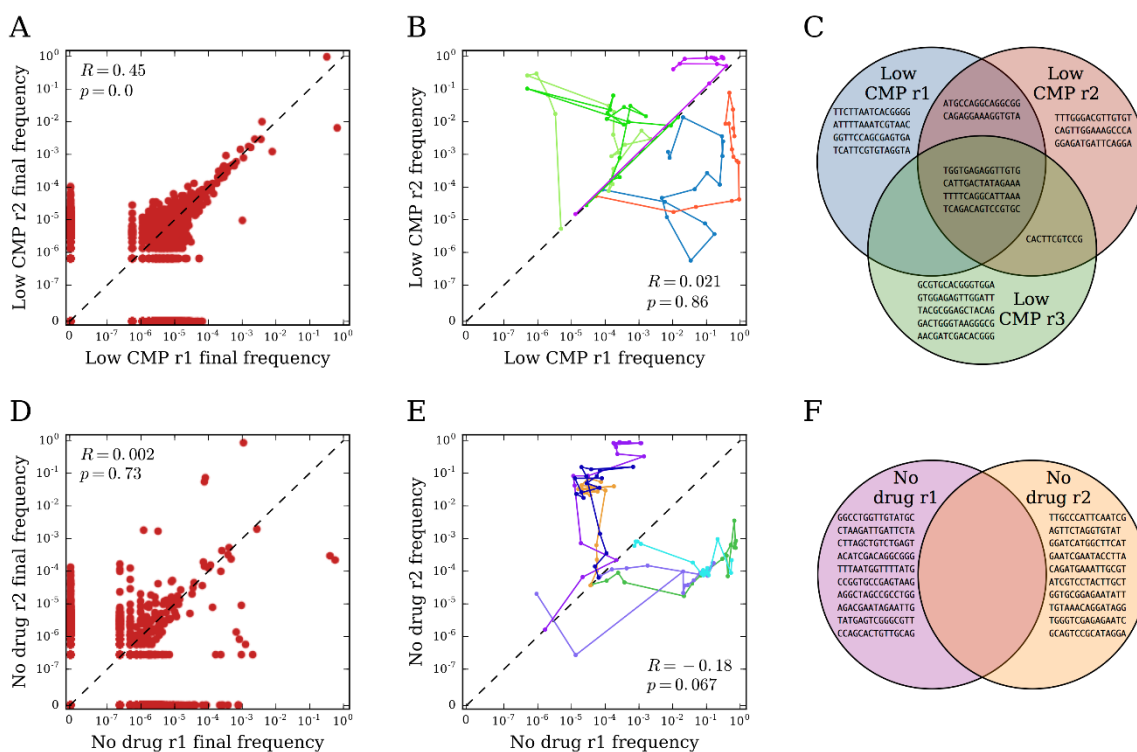

14

15 **Figure 5: Repeatability of lineage dynamics.** (A) Final frequencies of all barcoded lineages  
 16 between two replicate populations in ‘low’ CMP. (B) Traces of lineage frequency over time for  
 17 the union of the top three barcodes (by average frequency) in two replicate ‘low’ CMP populations.  
 18 (C) Venn diagram of the top 10 barcodes (ranked by mean frequency over the experiment) in each  
 19 replicate of ‘low’ CMP. (D) Same as (A) but for two replicate populations in ‘no drug’. (E) Same  
 20 as (B) but for two replicate populations in ‘no drug’. In all panels, the dashed black lines mark the  
 21 line of identity. (F) Same as (C) but for ‘no drug’ condition.

1 **Dynamics of individual lineages reveal clonal interference and the relative**  
2 **contribution of standing genetic variation versus and *de novo* mutations.** One of the  
3 most salient features of individual lineages is that many of them appear to follow very  
4 similar trajectories (**Fig. S6**). To further elucidate the striking amount of similarity among  
5 some populations, we turned to the analysis of individual lineage trajectories in these  
6 populations. To that end, we performed hierarchical clustering of a subset of high-  
7 frequency lineage frequency trajectories in each population, based on the correlation  
8 coefficients between trajectories (**Figs. S11, S12**). We saw that the trajectories indeed  
9 formed well-defined clusters of distinct behaviors (**Fig. S13**); in particular, similar clusters  
10 appeared in replicate populations from the same condition, while more different clusters  
11 appeared in populations from different conditions. A few clustered trajectories also shared  
12 barcodes with very similar sequences, suggesting these lineages are actually the same (the  
13 distinct barcodes arising from sequencing errors) (**Fig. S14**). However, the fact that the  
14 vast majority of clustered trajectories involved unrelated barcode sequences suggests they  
15 are truly distinct lineages with highly correlated dynamics.

16 Arguably, the most interesting trajectory clusters are those that are non-monotonic  
17 with time, suggesting clonal interference. For example, **Fig. 6A,B,C** shows trajectory  
18 clusters from three populations in ‘low’ CMP with this property: these trajectories initially  
19 increased due to positive selection, but then later decreased as new mutations arose on other  
20 trajectories and outcompeted them. Every other population showed a similar cluster of  
21 trajectories, except those in ‘low’ TMP (**Fig. S13**); for example, **Fig. 6E,F** shows these  
22 trajectories in populations evolved without drug. The fact that these trajectories started  
23 increasing immediately suggests that beneficial mutations must have already been present  
24 on these lineages before the experiment. Indeed, the chromosomal barcoding process  
25 requires ~30 generations of growth from the common ancestor. We surmised that during  
26 this time, random mutations began to accumulate in the population and, inevitably, were  
27 carried over to the evolution experiments. This also suggests an explanation for why some  
28 lineages rose to high frequency in multiple populations; these lineages likely carried  
29 beneficial mutations from the beginning, which allowed them to repeatedly dominate. We  
30 also observed a qualitatively different class of clonal interference trajectories, which did  
31 not start increasing immediately, but rose later in the experiment. For example, **Fig. 6G,H**  
32 shows these clusters in populations evolved with no drug. These trajectories appear to

1 increase due to new mutations that arose during the experiment itself, rather than because  
2 of pre-existing mutations. We saw clusters of these trajectories in every population except  
3 those in ‘low’ CMP (**Fig. S13**). However, in replicate 1 of ‘low’ CMP, we do saw  
4 trajectories demonstrating both pre-existing beneficial mutations as well as new mutations,  
5 which initially rose due to the pre-existing mutations, then decreased from clonal  
6 interference, but then rose again due to the occurrence of a new mutation (**Fig. 6D**).  
7

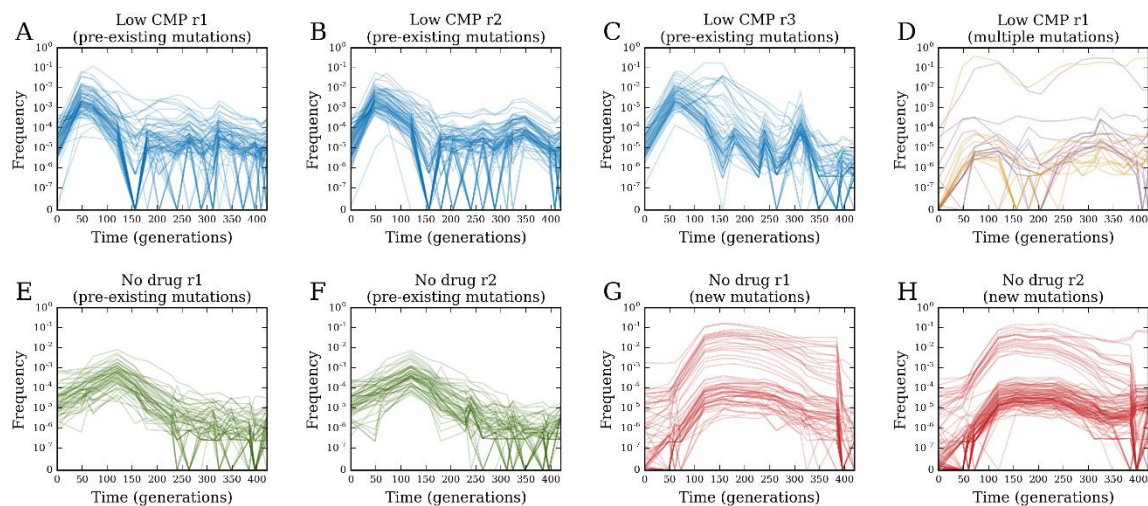

8  
9 **Figure 6: Distinct patterns of trajectories from pre-existing and new mutations.** Clustered  
10 trajectories in (A) ‘low’ CMP replicate 1, (B) ‘low’ CMP replicate 2, and (C) ‘low’ CMP replicate  
11 3 with putative pre-existing beneficial mutations. (D) Clustered trajectories in ‘low’ CMP replicate  
12 1 with multiple beneficial mutations. Clustered trajectories in (E) ‘no drug’ replicate 1 and (F) ‘no  
13 drug’ replicate 2 with putative pre-existing beneficial mutations; clustered trajectories in (G) ‘no  
14 drug’ replicate 1 and (H) ‘no drug’ replicate 2 with putative new beneficial mutations.  
15

16

## 17 Discussion

18 Detailed understanding of evolutionary processes depends on our ability to follow  
19 individual lineages at a whole population level throughout multiple generations.  
20 Abundance of small-effect mutations in large populations makes it important to track  
21 lineages down to very low frequencies, ideally  $10^{-5} - 10^{-6}$ , in particular, during the initial  
22 rounds of evolution. However, methods for labeling lineages or whole-genome sequencing  
23 typically limit this resolution to orders of magnitude higher. Here we overcome this hurdle  
24 by developing a method that, for the first time, generates *E. coli* populations carrying  $10^5$ -  
25  $10^6$  unique chromosomal barcodes. We tested the utility of the method by subjecting the



1 barcoded population to serial passaging in presence of sub-inhibitory concentrations of  
2 common antibiotics. The relatively large size of the evolving populations ( $>10^7$ ) and the  
3 limited number of generations ( $\sim 420$ ) have practically eradicated the contribution of drift  
4 to fixation of lineages in our experimental system, rendering selection the main force  
5 driving the loss of lineage diversity. Therefore, we can interpret the loss of lineage diversity  
6 as a proxy for the rate of adaptation in the population. We found that each condition  
7 prompted a different rate of adaptation (**Fig. 3A**), with the exception of ‘ultra-low’ CMP  
8 and ‘no drug’ conditions, which exhibited similar dynamics. Unexpectedly, ‘ultra-  
9 low’ TMP substantially reduced the rate of adaptation and lineage diversity loss, even  
10 compared to the rates observed for ‘ultra-low’ CMP and ‘no drug’ conditions. Since the  
11 growth dynamics of these populations indicate they experience a similar number of  
12 generations per passage as the other populations (**Fig. S3E,F**), we hypothesize that the  
13 observed delay in adaptation is due to a reduction in selection coefficients on beneficial  
14 mutations, compared to both the higher concentration of TMP (‘low’ TMP) and the  
15 condition without antibiotics. It was suggested that, at a low dosage, antibiotics might  
16 operate not as a weapon, but rather as signaling molecules that trigger transcriptional  
17 activation of multiple genes, including genes involved in the biosynthesis of amino acids,  
18 ribosomal proteins, purines, and pyrimidines<sup>21</sup>. If TMP, which is known to affect  
19 transcription<sup>36</sup>, indeed induces a new metabolic state in the bacterial cells at ultra-low  
20 concentration, it can potentially lead to a shift in the distribution of beneficial mutations.  
21 Namely, the fitness advantage of mutations under growth in the absence of antibiotics can  
22 decrease in the presence of 10 ng/ml of TMP, which is the ultra-sub-MIC concentration  
23 used in our experiment. It is important to note that we could not have easily detected a  
24 delayed adaptation in populations subjected to ‘ultra-low’ TMP, had we not used the  
25 barcode sequencing approach. Investigating the mechanism underlying the delayed  
26 adaptation at ‘ultra-low’ TMP is the subject of another work in the immediate future.

27         One of the important problems in evolutionary biology is robustly quantifying the  
28 reproducibility of evolutionary processes<sup>37,38</sup>. The deterministic nature of adaptation at  
29 near-lethal drug concentrations has been demonstrated at the level of a handful of strongly-  
30 beneficial mutations that have repeatedly accumulated in almost pre-determined order in  
31 replicate populations<sup>39</sup>. However, quantifying the reproducibility of evolutionary dynamics  
32 driven by many small-effect mutations at the whole-population level has remained elusive

1 in bacteria. Our chromosomal barcoding system in *E. coli* allowed us to directly address  
2 this problem by quantitatively comparing lineage dynamics across independent replicate  
3 populations subjected to identical antibiotic regimes. We found that the rate of lineage  
4 diversity loss was highly reproducible for each selection condition (**Fig. 3A**), indicating  
5 that lineage diversity analysis provides a robust way to quantify the reproducibility of  
6 evolution at a whole-population level. Curiously, the diversity dynamics were reproducible  
7 regardless of the rate of adaptation, For example, both ‘low’ CMP condition, which induced  
8 the fastest rate of adaptation, and ‘ultra-low’ TMP condition, which induced the slowest  
9 adaptation dynamics, exhibited high reproducibility between evolutionary replicates. This  
10 observation implies a surprising deterministic dynamics at the level of lineage diversity,  
11 despite differences in the distributions of fitness effects across conditions in our  
12 experiment.

13 The dynamics were furthermore deterministic at the level of individual lineages in  
14 some cases, with a few lineages rising to high frequency in multiple independently evolving  
15 populations. Populations can adapt to new environments using two sources of beneficial  
16 mutations: pre-existing mutations (i.e., standing genetic variation) and new mutations<sup>40</sup>.  
17 These two mechanisms can have different effects on the rates and outcomes of evolution,  
18 yet delineating the evolutionary dynamics with respect to the relative contributions of pre-  
19 existing and new mutations is nontrivial. Competition experiments in presence of sub-MIC  
20 amounts of antibiotics demonstrated that pre-existing mutations can be enriched for by sub-  
21 MIC selection<sup>30,41</sup>. Sub-MIC selection was also shown to increase the frequency of new  
22 resistance-conferring mutations in evolving populations<sup>30,42</sup>. However, neither the relative  
23 contribution of standing genetic variation versus novel mutations in a single population  
24 under sub-MIC selection, nor the evolutionary dynamics resulting from the interplay  
25 between these two mutational sources have been demonstrated. Here, we developed a  
26 quantitative approach to address this problem. By applying a measure of lineage  
27 composition dissimilarity from ecology<sup>34,35</sup>, we compared the change in frequency of  
28 identical lineages between independent replicates subjected to identical conditions over the  
29 evolutionary time course. These results suggest that lineages present at very low  
30 frequencies at the initial population, but nonetheless independently reaching high  
31 frequency in the replicate populations, are repetitively selected for because they carry pre-  
32 existing beneficial mutations. Thus, the extent of similarity in lineage composition between

1 evolutionary replicates at a particular time point quantitatively reports on the contribution  
2 of standing genetic variation to the observed dynamics. Expectedly, the rapid adaptation  
3 under ‘low’ CMP was accompanied by the lowest dissimilarity index among selection  
4 regimes (**Fig. 4**), indicating a heavy contribution of standing genetic variation. Conversely,  
5 very little indication of the contribution of pre-existing variation can be seen for ‘ultra-low’  
6 TMP and ‘no drug’ conditions (**Fig. 4**), indicating that the evolutionary dynamics of the  
7 latter was driven mostly by newly acquired mutations. Further support for the importance  
8 of pre-existing beneficial mutations comes from our analysis of individual trajectories.  
9 Lineages increasing in frequency due to a newly-acquired beneficial mutation show a finite  
10 establishment time (time required for a lineage prior to committing to a deterministic  
11 growth after acquisition of a mutation). In contrast, lineages carrying pre-existing  
12 mutations increase immediately upon applying selection pressure, with zero establishment  
13 time. Indeed, among all the identified individual lineages exhibiting clonal interference  
14 trajectories (**Fig. S13**), no establishment time can be seen under ‘low’ CMP conditions,  
15 while finite establishment times can be detected in all other conditions.

16 Overall, our results demonstrate significant evolutionary insights gleaned from  
17 high-resolution lineage tracking using chromosomal barcodes in *E. coli*. Our experimental  
18 barcoding protocol based on the Tn7 transposon machinery is straightforward to implement  
19 and can readily be reproduced in a variety of systems. We have furthermore shown how  
20 to obtain a robust quantitative analysis of the resulting lineage data using ecological  
21 diversity indices. Altogether, we envision that this tool will find wide applicability in  
22 addressing diverse questions in bacterial population and evolutionary dynamics.

23

## 24 **Methods**

25 **Design of the chromosomal barcode integration system in *E. coli*.** The design of the  
26 chromosomal integration system of the barcode library is based on the pGRG25 plasmid,  
27 which carries all the components of the Tn7 transposon site-specific recombination  
28 machinery<sup>25,43,44</sup>. We separated the Tn7 transposase machinery (tnsABCDE) from the Tn7  
29 arms (Tn7L, Tn7R) onto two independent plasmids: the temperature-sensitive *helper*  
30 plasmid (pSC101 temperature-sensitive origin of replication) carrying the *tnsABCD* genes  
31 under the control of an arabinose-inducible pBAD promoter (**Fig. 1A**), and the suicide  
32 *integration* plasmid (R6K gamma *pir*<sup>+</sup> dependent origin of replication) with the Tn7 arms

1 flanking the barcode-carrying cassette and spectinomycin resistance gene (**Fig. 1B,C**). The  
2 separation of the recombination machinery *tnsABCD* from the integration segment flanked  
3 by the Tn7 arms achieves two major goals. First, the introduction of the helper plasmid into  
4 the cells prior to the integration plasmid allows us to precondition the cells for  
5 chromosomal recombination by inducing the expression of the transposase complex, which  
6 is expected to increase the integration efficiency. Second, the transient nature of the  
7 integration plasmid will eliminate any possibility of barcodes lingering outside of their  
8 designated chromosomal location due to unsuccessfully cured plasmids. This is especially  
9 important for barcoding temperature-sensitive strains that cannot be grown at non-  
10 permissive temperatures. The design of the barcode carrying cassette (**Fig. 1C**) is aimed  
11 at minimizing the number of library preparation steps required for Illumina deep-  
12 sequencing technology. The only variable region in the cassette is the barcode sequence of  
13 15 random nucleotides. Thus, the barcode library has a theoretical diversity of  $4^{15}$  ( $\sim 10^9$ )  
14 unique barcodes. The barcodes are asymmetrically located 9 nt downstream of the 5' end  
15 of the cassette. This short stretch of 9 nt is sufficient to locate the barcodes in the raw  
16 sequencing data files and to reduce the sequence redundancy in the Illumina flow cell. The  
17 cassette is flanked by the sequences complementary to the Illumina adapter primers used  
18 to anchor library specific indexes recognized by the Illumina sequencing platforms (MiSeq,  
19 HiSeq, or Nextseq) (**Fig. 1C**). The Integrated DNA Technology (IDT) gBlocks service  
20 synthesized the barcode cassettes (allowing the incorporation of 15 consecutive and  
21 variable nucleotides), which we then cloned into the Tn7 integration plasmid (**Fig. 1B**). We  
22 characterized the resulting library of barcodes by deep sequencing prior to integration into  
23 the genome (**Fig. S1**).

24

25 **Design of the barcode-carrying cassette.** The barcodes comprise 15 random nucleotides,  
26 which we placed 9 nt downstream of the 5' end of the 288-nt long cassette:

27

28 gtcgcgcccggNNNNNNNNNNNNNNNNtattctcggtagtgggatacgcgataccgaagaca  
29 gctcatgttatatcccgcggttaaccaccatcaaacaggattttcgcctgctggggcaaa  
30 ccagcgtggaccgcttgctgcaactctctcagggccaggcgggtgaagggaatcagctgt  
31 tgcccgtctcactggtgaaaagaaaaaccaccctggcgcccaatacgcgaaaccgcctctc  
32 cccgcgcggttgccgattcattaatgcagctggcacgcaggtttccc

1

2 We placed the barcode-carrying cassette between sequences complementary to Illumina

3 adaptor primers (forward overhang: 5'

4 TCGTCGGCAGCGTCAGATGTGTATAAGAGACAG; reverse overhang: 5'

5 GTCTCGTGGGCTCGGAGATGTGTATAAGAGACAG) and, finally, flanked by

6 sequences complementary to the integration site in the Tn7 integration plasmid:

7

8 gatatcggatcctagtaagccacgttttaattaatcagatccctcaatagccacaacaac

9 tggcgggcaaacagtcggtgctgattggtcgtcggcagcgtcagatgtgtataagagaca

10 gtcgcgcccggNNNNNNNNNNNNNNNNNNtattctcggtagtgggatacgcgataccgaagaca

11 gctcatgttatatcccgcggttaaccaccatcaaacaggatttttcgcctgctggggcaaa

12 ccagcgtggaccgcttgcgcaactctctcagggccaggcgggtgaagggcaatcagctgt

13 tgccgtctcactggtgaaaagaaaaaccaccctggcgcccaatacgcaaaccgcctctc

14 cccgcgcggttgccgattcattaatgcagctggcacgcaggtttccctgtctcttata

15 cacatctccgagcccacgagacgccaactcgagttatttgccgactaccttggtgatctcg

16 cctttcacgtag

17

18 Integrated DNA Technology (IDT) ([https://www.idtdna.com/pages/products/genes-and-](https://www.idtdna.com/pages/products/genes-and-gene-fragments/gblocks-gene-fragments)

19 [gene-fragments/gblocks-gene-fragments](https://www.idtdna.com/pages/products/genes-and-gene-fragments/gblocks-gene-fragments)) synthesized the resulting 492 nt-long sequence

20 as double-stranded gBlock with randomly mixed bases (at the 15 consecutive positions

21 indicated by N).

22

23 **Generation of plasmid barcode library.** We digested the empty Tn7 integration plasmids

24 with NotI, purified them by ethanol precipitation, and then mixed the plasmids with

25 gBlocks in a 1:3 molar ratio in the presence of NEBuilder HiFi DNA (New England

26 Biolabs) assembly mix according to the manufacturer's instructions. We used a control

27 without NEBuilder HiFi DNA assembly mix to determine the background level (Tn7

28 integration plasmid lacking the cassette). We concentrated the reactions by ethanol

29 precipitation and transformed them into 100  $\mu$ L of TransforMax™ EC100D™ *pir*<sup>+</sup> cells

30 (Lucigen). We resuspended the transformed cells in 1 mL of SOC medium, regenerated

31 them for 1 hour at 37 °C with shaking followed by overnight incubation on the bench, and

32 then plated the cells on 35  $\mu$ g/ml kanamycin LB agar plates (100  $\mu$ L of transformed cells

1 per plate). We plated several microliters of diluted cultures separately to determine the  
2 number of colony-forming cells. We incubated plates overnight at 37 °C. Cells transformed  
3 with DNA but without the assembly mix produced no colonies. Transformation of DNA  
4 with the assembly mix generated a total of  $\sim 2.4 \times 10^6$  colonies (**Fig. 1D**). We scraped all  
5 the colonies from the plates, pooled them together, and thoroughly mixed them. Finally,  
6 we extracted plasmids from the pooled cells with a Qiagen midi kit.

7

8 **Chromosomal integration of the barcode library into *E. coli* cells.** This is a two-step  
9 process, the first step being the transformation of the recipient *E. coli* MG1655 cells with  
10 the Tn7 helper plasmid and induction of the transposase integration machinery. The second  
11 step is the transformation of the Tn7 integration plasmid library, which will integrate the  
12 barcodes into the chromosome (**Fig. 1D**). We grew cells transformed with the Tn7 helper  
13 plasmid overnight until saturation in LB supplemented with 100 µg/mL ampicillin at 30  
14 °C. We then diluted these cells 1:100 and grew them under the same condition for 45 min.  
15 We added 0.2% arabinose and diluted cells to OD<sub>600nm</sub> of 0.5. We then harvested the cells,  
16 washed them 3 times with ice-cold water, and transformed them with the Tn7 integration  
17 plasmid library using electroporation. We resuspended the transformed cells in 1 mL of  
18 SOC medium, regenerated them for 1 hour at 30 °C with shaking followed by overnight  
19 incubation on the bench, and then plated them on 100 µg/mL spectinomycin LB agar plates  
20 (100 µL of transformed cells per plate). We plated several microliters of diluted culture  
21 separately to determine the number of colony-forming cells. We incubated plates overnight  
22 at 37 °C and produced  $\sim 2 \times 10^6$  colonies in total. All randomly-picked colonies (over 50)  
23 failed to grow on ampicillin, suggesting that overnight incubation at 37 °C is sufficient to  
24 cure the majority of cells of the Tn7 helper plasmids. Similarly, we observed no growth on  
25 kanamycin, showing that the Tn7 integration plasmids were no longer present. We further  
26 validated the chromosomal incorporation of the barcode-carrying cassettes by colony PCR  
27 with a pair of primers directed to the Tn7 integration site. All randomly-picked colonies  
28 (over 50) were positive for the chromosomal integration. We scraped all the colonies from  
29 the plates, pooled them together, thoroughly mixed them, aliquoted them with 15%  
30 glycerol, and stored them at -80 °C.

31

1 **Deep sequencing of the gBlocks library, the Tn7 integration plasmid library, and the**  
2 **naïve barcoded *E. coli* population.** Sample preparation for deep sequencing involved four  
3 steps. First, we amplified the barcode-carrying cassettes with Illumina adaptor primers  
4 (forward overhang: 5' TCGTCGGCAGCGTCAGATGTGTATAAGAGACAG; reverse  
5 overhang: 5' GTCTCGTGGGCTCGGAGATGTGTATAAGAGACAG). We used  
6 gBlocks and the Tn7 integration plasmid library directly as DNA templates in the PCR  
7 reaction. In the case of the naïve barcoded *E. coli* population, we performed the PCR  
8 reaction either directly on the cells or, alternatively, on the genomic DNA extracted from  
9 the barcoded population with Nucleospin Microbial DNA prep kit (Machary-Nagel).  
10 Second, we separated the PCR product on 1% agarose gel, excised it, and purified it using  
11 NucleoSpin Gel extraction kit (Machary-Nagel). Third, we subjected the gel-purified  
12 product of the first PCR reaction to a second PCR reaction using a pair of index primers  
13 from Nextera XT DNA library preparation kit (Illumina). Fourth, we purified the product  
14 of the second PCR reaction with Agencourt AMPure XP PCR purification kit (Beckman  
15 Coulter). We performed sequencing on MiSeq or NextSeq platforms (Illumina).

16

17 **Laboratory evolution.** We subjected the naïve barcoded *E. coli* population to laboratory  
18 evolution via serial passaging under five distinct growth conditions: 'low' chloramphenicol  
19 (CMP) (1-3 µg/mL), 'ultra-low' CMP (0.1 µg/mL), 'low' trimethoprim (TMP) (0.1-1.2  
20 µg/mL), 'ultra-low' TMP (0.01-0.1 µg/ml), and 'no drug' (**Fig. S3A,B**). We grew cells at  
21 37 °C in a 96-well microtiter plate (500 µL per well) in supplemented M9 medium (0.2%  
22 glucose, 1mM MgSO<sub>4</sub>, 0.1% casamino acids, 0.5 mg/ml thiamin). Between passages, we  
23 grew cultures for 8-9 hours (during the day) or 10-12 hours (during the night). We used  
24 saturated culture from a previous passage to inoculate a fresh plate by 1:100 dilution (5 µL  
25 of saturated cultured into 500 µL of fresh medium). Overall, we performed 70 passages.  
26 We measured optical density (OD) of the cultures at 600 nm at the end of each passage.  
27 We convert the raw OD measurements to an estimated number of cells (**Fig. S3C,D**) as  
28 follows: we first multiply by 10 to correct for dilution of the measured culture, then  
29 multiply by 2 to standardize the OD to 1 cm path length, then multiply by cell density 10<sup>8</sup>  
30 cells/mL/OD, and finally multiply by 0.2 mL as the volume of the well. We stored every  
31 second passage at -80 °C after addition of 15% glycerol.

32

1 **Fitness measurements of the evolving barcoded *E. coli* populations.** We estimated  
2 fitness of the evolving populations by calculating the change in IC<sub>50</sub> of chloramphenicol  
3 or trimethoprim. To this end, we sampled cells from three populations evolved in ‘low’  
4 CMP (wells A1, B1, and C1), three populations evolved in ‘ultra-low’ CMP (wells A3, B3,  
5 and C3), and two populations evolved without antibiotics (wells E9 and F9) at passages 0,  
6 8, 10, 12, 20, 30, and 70. We diluted these samples 1:100 into growth medium  
7 supplemented with 0, 1, 2, 4, 8, or 16 µg/mL of chloramphenicol, and followed their growth  
8 by OD measurements at 600 nm (**Figs. S2A, S4A**). We calculated the area under these  
9 growth curves over the time of growth (**Fig. S4B**) and normalized the area values so that  
10 they equaled 1 at zero antibiotic (**Fig. S4C**). We determined the IC<sub>50</sub> by calculating the  
11 concentration of antibiotic at which growth (defined as normalized area under the growth  
12 curve) was reduced by 50% relative to zero antibiotic (**Fig. S4C**). We inferred the IC<sub>50</sub>  
13 concentration by interpolating the area vs. drug concentration curves. We similarly  
14 obtained IC<sub>50</sub> values for two populations evolved in ‘low’ TMP (wells A5 and B5), two  
15 populations evolved in ‘ultra-low’ TMP (wells G7 and H7), and two populations evolved  
16 without antibiotics (wells E9 and F9), all at the same time points as for CMP. We used  
17 TMP concentrations 0, 0.5, 1, 2, 5, 10, and 20 µg/mL.

18  
19 **Deep sequencing of the evolving barcoded *E. coli* populations.** We sequenced barcodes  
20 at 16 time points over the evolution experiment for the same 12 independent populations  
21 used for the fitness measurements: three populations in ‘low’ CMP (wells A1, B1, and C1),  
22 three populations in ‘ultra-low’ CMP (wells A3, B3, and C3), two populations in ‘low’  
23 TMP (wells A5 and B5), two populations in ‘ultra-low’ TMP (wells G7 and H7), and two  
24 populations in no antibiotics (wells E9 and F9). We first amplified these 192 bacterial  
25 cultures with Illumina adaptor primers (15 µL of defrosted cells from each culture). We  
26 performed the second PCR in two groups, each with 96 unique Nextera XT primers. We  
27 then pooled together 96 PCR reactions from each group, spiked them with 30% of PhiX  
28 DNA, and sequenced them on a Nextseq High Output 75 platform. The sequencing  
29 protocol commenced with 9 dark cycles to account for the sequence redundancy preceding  
30 the barcode area. For one sample – ‘ultra-low’ CMP, replicate 2 (well A3) at passage 54 –  
31 all PCR reactions failed, and thus we excluded this sample from all further analysis.

32



1 **Analysis of sequencing data.** First, we exclude sequencing samples that report fewer than  
2  $10^6$  reads; this affects one of the samples from the initial population and six of the samples  
3 from the evolving populations (**Table S1**). All remaining samples have between  $10^6$  and  
4  $7 \times 10^6$  reads. Next, we exclude all reads with minimum base quality score less than 10  
5 (Phred scale), which affects 0.02-0.05% of reads (**Table S1**). To identify barcodes, we  
6 first align each read to the reference sequence for the barcode cassette. We allow up to  
7 three mismatches or one indel with respect to the reference; we also require that the read  
8 overlap the barcode by at least 10 nt. With these criteria we identify barcodes on more than  
9 95% of reads in almost all samples (**Table S1**). For each read with a valid alignment, we  
10 extract a barcode as the sequence aligning to the variable region in the reference.

11 To correct for sequencing errors in the raw barcodes, we use the bartender  
12 package<sup>45</sup> on default settings to cluster together barcodes with similar sequences. In  
13 general, this method assumes that a low-frequency barcode differing at only one or two  
14 bases from a high-frequency barcode is the result of a sequencing error, so that the low-  
15 frequency barcode is merged into the high-frequency one. This produces a set of putatively  
16 true barcodes for the sample.

17 To ensure that we identify true barcodes consistently across samples, we first pool  
18 raw barcodes and perform clustering on these pooled samples. We pool barcodes both  
19 across time points for each population (to build trajectories of barcodes over time in each  
20 population) as well as across populations for each time point (to compare barcodes between  
21 populations). After clustering we disaggregate the true barcodes from the pooled data back  
22 into the individual samples, where we normalize them by the total number of reads in that  
23 sample. This yields a set of lineage frequencies  $\{x_k\}$  (where the index  $k$  runs over all  
24 barcodes) for each population at each time point.

25  
26 **Quantifying lineage diversity.** The simplest way to quantify the diversity of lineages in a  
27 population is to count the number of unique barcodes observed at a particular time point  
28 (**Fig. 3A**). However, if lineages differ widely in frequency, then this measure may not be  
29 very informative and will suffer from significant sampling bias (since very low-frequency  
30 barcodes will be under-sampled). A more general approach is to define the *effective*  
31 number of lineages using the diversity index  ${}^qD$  from ecology<sup>34</sup>. We construct this

1 definition in analogy with the case where all lineages are at equal frequency, so that the  
 2 number of lineages is simply the reciprocal of this frequency:

$$3 \quad \text{number of lineages} = \frac{1}{\text{frequency of each lineage}}. \quad (1)$$

4 When lineages are not at equal frequencies, we replace the frequency in the denominator  
 5 by a mean frequency over all lineages. Define the generalized mean (also known as the  
 6 power mean) of a quantity  $h_k$ , with normalized weights  $p_k$  ( $\sum_k p_k = 1$ ) and parameter  $q$ :

$$7 \quad \langle h_k | p_k, q - 1 \rangle = \left( \sum_k p_k h_k^{q-1} \right)^{1/(q-1)}. \quad (2)$$

8 The parameter  $q$  controls how strongly the mean depends on very small or very large values  
 9 of  $h_k$ : lower values of  $q$  more strongly weigh low values of  $h_k$ , while higher values of  $q$   
 10 weight high values of  $h_k$  more strongly. When  $q = 2$ , Eq. 2 reduces to the ordinary  
 11 arithmetic mean; when  $q = 1$ , it is equivalent to the geometric mean; and when  $q = 0$ , it  
 12 is the harmonic mean.

13 We therefore define the effective number of lineages as the reciprocal of the  
 14 generalized mean frequency over all lineages, weighing each frequency by itself<sup>34,35</sup>:

$$15 \quad \begin{aligned} {}^q D &= \frac{1}{\langle x_k | x_k, q - 1 \rangle} \\ &= \left( \sum_{\text{lineage } k} x_k^q \right)^{1/(1-q)}. \end{aligned} \quad (3)$$

16 The diversity index is mathematically equivalent to the exponential of the Renyi entropy  
 17 in physics<sup>46</sup>. Special values of the parameter  $q$  correspond to common ecological measures  
 18 of diversity:

$$q = 0: \quad {}^q D = \text{number of lineages with nonzero frequency (species richness)} \quad (4)$$

$$q = 1: \quad {}^q D = \exp\left(\sum_{\text{lineage } k} x_k \log x_k\right) \text{ (Shannon diversity)} \quad (5)$$

$$q = 2: \quad {}^q D = \left(\sum_{\text{lineage } k} x_k^2\right)^{-1} \text{ (reciprocal Simpson concentration)} \quad (6)$$

$$q = \infty: \quad {}^q D = \frac{1}{\max_{\text{lineage } k} x_k}. \quad (7)$$

19 Note that the effective number of lineages according to Eq. 3 equals the actual number of  
 20 lineages for any  $q$  if all lineages have equal frequency. **Figure 3** shows the diversity  
 21 indices for  $q = 0$ ,  $q = 1$ , and  $q = \infty$  for each population over the course of the evolution  
 22 experiment.

1 **Quantifying dissimilarity of lineage composition between populations.** We can also use  
 2 ecological diversity indices to quantitatively compare the lineage compositions of two or  
 3 more populations. Let  $M$  be the number of populations we comparing ( $M \geq 2$ ), and let  
 4  $x_k^{(p)}$  be the frequency of lineage  $k$  in population  $p$  ( $= 1, 2, \dots, M$ ) at a particular time point.  
 5 If we pool together all  $M$  populations, the frequency of lineage  $k$  is

$$6 \quad \bar{x}_k = \frac{1}{M} \sum_{\text{population } p} x_k^{(p)}. \quad (8)$$

7 The total diversity of the pooled population (“gamma diversity”) is<sup>34,35</sup>:

$$8 \quad \begin{aligned} {}^q D_{\text{pooled}} &= \frac{1}{\langle \bar{x}_k | \bar{x}_k, q-1 \rangle} \\ &= \left( \sum_k \bar{x}_k^q \right)^{1/(1-q)}. \end{aligned} \quad (9)$$

9 We can decompose this total diversity into two factors:

$$10 \quad {}^q D_{\text{pooled}} = {}^q D_{\text{mean}} {}^q M_{\text{eff}}. \quad (10)$$

11 The first factor on the right-hand side of Eq. 10 is the mean diversity across all populations  
 12 (“alpha diversity”):

$$13 \quad \begin{aligned} {}^q D_{\text{mean}} &= \frac{1}{\left\langle \frac{1}{{}^q D^{(p)}} \middle| \frac{1}{M}, q-1 \right\rangle} \\ &= \left( \frac{1}{M} \sum_{\text{population } p} [{}^q D^{(p)}(t)]^{1-q} \right)^{\frac{1}{1-q}}, \end{aligned} \quad (11)$$

14 where  ${}^q D^{(p)}$  is the diversity of population  $p$  alone (Eq. 3). The second factor on the right-  
 15 hand side of Eq. 10 is the effective number of distinct populations (“beta diversity”):

$$16 \quad \begin{aligned} {}^q M_{\text{eff}} &= \frac{{}^q D_{\text{pooled}}}{{}^q D_{\text{mean}}} \\ &= \left( \frac{\sum_{\text{lineage } k} \bar{x}_k^q}{\frac{1}{M} \sum_{\text{population } p} \sum_{\text{lineage } k} [x_k^{(p)}]^q} \right)^{1/(1-q)}. \end{aligned} \quad (12)$$

17 This quantity has a minimum value of 1 if the populations have identical lineages at  
 18 identical frequencies, and a maximum value of  $M$  if none of the populations have any  
 19 lineages in common. To simplify the interpretation of this quantity across cases where we  
 20 may be comparing different numbers of populations (e.g., three replicates in ‘low’ CMP

1 versus two replicates in ‘low’ TMP), we shift and rescale  ${}^qM_{\text{eff}}$  to obtain a measure of  
 2 dissimilarity between populations that ranges from 0 to 1:

$$3 \quad \text{Dissimilarity between populations} = \frac{{}^qM_{\text{eff}} - 1}{M - 1}. \quad (13)$$

4 We plot this normalized quantity in all figures (**Figs. 4, S8, S9**).

5 In the case of  $q = 0$ ,  ${}^qM_{\text{eff}}$  simply measures how many lineages are in common  
 6 between the populations under comparison. Let  $B^{(p)}$  be the set of lineages with nonzero  
 7 frequencies in population  $p$ , and let  $|B^{(p)}|$  denote the number of lineages in this set. Then  
 8 the effective number of distinct populations is

$$9 \quad {}^qM_{\text{eff}} = \frac{|\cup_{\text{population } p} B^{(p)}|}{\frac{1}{M} \sum_{\text{population } p} |B^{(p)}|}. \quad (14)$$

10 For two populations ( $M = 2$ ), we can rewrite this as

$$11 \quad \begin{aligned} {}^qM_{\text{eff}} &= \frac{|B^{(1)} \cup B^{(2)}|}{\frac{1}{M} (|B^{(1)}| + |B^{(2)}|)} \\ &= 2 - \frac{1}{\frac{1}{2} \left( \frac{|B^{(1)}|}{|B^{(1)} \cap B^{(2)}|} + \frac{|B^{(2)}|}{|B^{(1)} \cap B^{(2)}|} \right)}, \end{aligned} \quad (15)$$

12 where we have invoked the inclusion-exclusion principle for sets:  $|B^{(1)} \cup B^{(2)}| = |B^{(1)}| +$   
 13  $|B^{(2)}| - |B^{(1)} \cap B^{(2)}|$ . That is,  ${}^qM_{\text{eff}}$  equals two minus the harmonic mean of the fractions  
 14 of overlapping lineages between the populations. For example,  ${}^qM_{\text{eff}} = 1.8$  means that  
 15 the two populations have 20% of their lineages in common.

16 In the case of  $q = 1$ , the effective number of lineages is the Shannon diversity  
 17 (Eq. 5). Therefore the effective number of distinct populations is equivalent to the  
 18 exponential of the Jensen-Shannon divergence between the  
 19 populations:

$$20 \quad {}^qM_{\text{eff}} = \exp \left[ \frac{1}{M} \sum_{\text{population } p} \sum_{\text{lineage } k} x_k^{(p)} \log \left( \frac{x_k^{(p)}}{\bar{x}_k} \right) \right]. \quad (16)$$

21 This is also equivalent to the weighted sum of the Kullback-Leibler divergences between  
 22 each population and the pooled population.

23 In the case of  $q = \infty$ , the effective number of distinct populations depends only on  
 24 the most abundant lineage in the pooled population and across all populations. That is,

1 
$${}^{\infty}D_{\text{pooled}} = \frac{1}{\max_{\text{lineage } k} \bar{x}_k}, \quad (17)$$

2 and

3 
$${}^{\infty}D_{\text{mean}} = \frac{1}{\max_{\text{population } p} \max_{\text{lineage } k} x_k^{(p)}}, \quad (18)$$

4 and so

5 
$${}^{\infty}M_{\text{eff}} = \frac{\max_{\text{population } p} \max_{\text{lineage } k} x_k^{(p)}}{\max_{\text{lineage } k} \bar{x}_k}. \quad (19)$$

6

7 **Clustering lineage frequency trajectories.** For each population, we exclude barcoded  
8 lineages that have zero detected frequency at more time points than a minimum number  
9 calculated as

10 
$$\lfloor 0.5(\text{total number of time points} + 11) \rfloor, \quad (20)$$

11 where  $\lfloor \cdot \rfloor$  is the floor function that rounds the argument down to the nearest integer. This  
12 ensures that all pairs of remaining lineages have at least 10 time points at which they both  
13 have nonzero frequency. This leaves between 310 and 695 lineages for each population.  
14 We cluster the frequency trajectories  $x_k(t)$  for these lineages using the hierarchical  
15 clustering routine in SciPy<sup>47</sup>. The distance metric between two lineages  $k_1$  and  $k_2$  is

16 
$$\Delta(x_{k_1}(t), x_{k_2}(t)) = 1 - \rho(\log x_{k_1}(t), \log x_{k_2}(t)), \quad (21)$$

17 where  $\rho(\log x_{k_1}(t), \log x_{k_2}(t))$  is the Pearson correlation coefficient between the  
18 logarithms of both frequency trajectories (excluding time points where either frequency is  
19 zero); **Fig. S13** shows matrices of all pairwise trajectory distances. We use the “average”  
20 linkage method (equivalent to unweighted pair group method with arithmetic mean, or  
21 UPGMA), which calculates the distance between two clusters as the arithmetic mean of  
22 the distances between all trajectories in both clusters. Other linkage methods produce  
23 qualitatively similar results. The hierarchical clustering results in dendrograms as shown  
24 in **Fig. S13**. Finally, we form flat clusters by setting thresholds on the dendrograms, which  
25 we manually choose for each population; these thresholds are shown on the dendrograms  
26 in **Fig. S13** and range from 0.35 to 0.65, which roughly mean that the correlation between  
27 trajectories within clusters is at least 0.35 or 0.65.

28

## 1   **References**

- 2   1     Lazar, V. *et al.* Genome-wide analysis captures the determinants of the antibiotic  
3       cross-resistance interaction network. *Nat Commun* **5**, 4352,  
4       doi:10.1038/ncomms5352 (2014).
- 5   2     Deatherage, D. E. & Barrick, J. E. Identification of mutations in laboratory-evolved  
6       microbes from next-generation sequencing data using breseq. *Methods Mol Biol*  
7       **1151**, 165-188, doi:10.1007/978-1-4939-0554-6\_12 (2014).
- 8   3     Otto, M. Next-generation sequencing to monitor the spread of antimicrobial  
9       resistance. *Genome Med* **9**, 68, doi:10.1186/s13073-017-0461-x (2017).
- 10  4     Xue, Y. & Wilcox, W. R. Changing paradigm of cancer therapy: precision medicine  
11       by next-generation sequencing. *Cancer Biol Med* **13**, 12-18,  
12       doi:10.28092/j.issn.2095-3941.2016.0003 (2016).
- 13  5     Blundell, J. R. *et al.* The dynamics of adaptive genetic diversity during the early  
14       stages of clonal evolution. *Nat Ecol Evol*, doi:10.1038/s41559-018-0758-1 (2018).
- 15  6     Desai, M. M., Walczak, A. M. & Fisher, D. S. Genetic diversity and the structure  
16       of genealogies in rapidly adapting populations. *Genetics* **193**, 565-585,  
17       doi:10.1534/genetics.112.147157 (2013).
- 18  7     Lang, G. I., Botstein, D. & Desai, M. M. Genetic variation and the fate of beneficial  
19       mutations in asexual populations. *Genetics* **188**, 647-661,  
20       doi:10.1534/genetics.111.128942 (2011).
- 21  8     Neher, R. A. & Hallatschek, O. Genealogies of rapidly adapting populations. *Proc*  
22       *Natl Acad Sci U S A* **110**, 437-442, doi:10.1073/pnas.1213113110 (2013).
- 23  9     Fox, E. J., Reid-Bayliss, K. S., Emond, M. J. & Loeb, L. A. Accuracy of Next  
24       Generation Sequencing Platforms. *Next Gener Seq Appl* **1**,  
25       doi:10.4172/jngsa.1000106 (2014).
- 26  10    Pfeiffer, F. *et al.* Systematic evaluation of error rates and causes in short samples  
27       in next-generation sequencing. *Sci Rep* **8**, 10950, doi:10.1038/s41598-018-29325-  
28       6 (2018).
- 29  11    Hegreness, M., Shores, N., Hartl, D. & Kishony, R. An equivalence principle for  
30       the incorporation of favorable mutations in asexual populations. *Science* **311**, 1615-  
31       1617, doi:10.1126/science.1122469 (2006).

- 1 12 Stannek, L., Egelkamp, R., Gunka, K. & Commichau, F. M. Monitoring  
2 intraspecies competition in a bacterial cell population by cocultivation of  
3 fluorescently labelled strains. *J Vis Exp*, e51196, doi:10.3791/51196 (2014).
- 4 13 Wetmore, K. M. *et al.* Rapid quantification of mutant fitness in diverse bacteria by  
5 sequencing randomly bar-coded transposons. *MBio* **6**, e00306-00315,  
6 doi:10.1128/mBio.00306-15 (2015).
- 7 14 Blundell, J. R. & Levy, S. F. Beyond genome sequencing: lineage tracking with  
8 barcodes to study the dynamics of evolution, infection, and cancer. *Genomics* **104**,  
9 417-430, doi:10.1016/j.ygeno.2014.09.005 (2014).
- 10 15 Jaffe, M., Sherlock, G. & Levy, S. F. iSeq: A New Double-Barcode Method for  
11 Detecting Dynamic Genetic Interactions in Yeast. *G3 (Bethesda)* **7**, 143-153,  
12 doi:10.1534/g3.116.034207 (2017).
- 13 16 Levy, S. F. *et al.* Quantitative evolutionary dynamics using high-resolution lineage  
14 tracking. *Nature* **519**, 181-186, doi:10.1038/nature14279 (2015).
- 15 17 Peikon, I. D., Gizatullina, D. I. & Zador, A. M. In vivo generation of DNA sequence  
16 diversity for cellular barcoding. *Nucleic Acids Res* **42**, e127,  
17 doi:10.1093/nar/gku604 (2014).
- 18 18 Jahn, L. J. *et al.* Chromosomal barcoding as a tool for multiplexed phenotypic  
19 characterization of laboratory evolved lineages. *Sci Rep* **8**, 6961,  
20 doi:10.1038/s41598-018-25201-5 (2018).
- 21 19 Cira, N. J., Pearce, M. T. & Quake, S. R. Neutral and selective dynamics in a  
22 synthetic microbial community. *Proc Natl Acad Sci U S A* **115**, E9842-E9848,  
23 doi:10.1073/pnas.1808118115 (2018).
- 24 20 Andersson, D. I. & Hughes, D. Microbiological effects of sublethal levels of  
25 antibiotics. *Nat Rev Microbiol* **12**, 465-478, doi:10.1038/nrmicro3270 (2014).
- 26 21 Davies, J., Spiegelman, G. B. & Yim, G. The world of subinhibitory antibiotic  
27 concentrations. *Curr Opin Microbiol* **9**, 445-453, doi:10.1016/j.mib.2006.08.006  
28 (2006).
- 29 22 Fajardo, A. & Martinez, J. L. Antibiotics as signals that trigger specific bacterial  
30 responses. *Curr Opin Microbiol* **11**, 161-167, doi:10.1016/j.mib.2008.02.006  
31 (2008).

- 1 23 Thomason, L. C., Sawitzke, J. A., Li, X., Costantino, N. & Court, D. L.  
2 Recombineering: genetic engineering in bacteria using homologous recombination.  
3 *Curr Protoc Mol Biol* **106**, 1 16 11-39, doi:10.1002/0471142727.mb0116s106  
4 (2014).
- 5 24 Choi, K. H. & Schweizer, H. P. mini-Tn7 insertion in bacteria with single attTn7  
6 sites: example *Pseudomonas aeruginosa*. *Nat Protoc* **1**, 153-161,  
7 doi:10.1038/nprot.2006.24 (2006).
- 8 25 McKenzie, G. J. & Craig, N. L. Fast, easy and efficient: site-specific insertion of  
9 transgenes into enterobacterial chromosomes using Tn7 without need for selection  
10 of the insertion event. *BMC Microbiol* **6**, 39, doi:10.1186/1471-2180-6-39 (2006).
- 11 26 Baquero, F., Alvarez-Ortega, C. & Martinez, J. L. Ecology and evolution of  
12 antibiotic resistance. *Environ Microbiol Rep* **1**, 469-476, doi:10.1111/j.1758-  
13 2229.2009.00053.x (2009).
- 14 27 Baquero, F. & Negri, M. C. Selective compartments for resistant microorganisms  
15 in antibiotic gradients. *Bioessays* **19**, 731-736, doi:10.1002/bies.950190814 (1997).
- 16 28 Wolfe, A. D. & Hahn, F. E. Mode of Action of Chloramphenicol. Ix. Effects of  
17 Chloramphenicol Upon a Ribosomal Amino Acid Polymerization System and Its  
18 Binding to Bacterial Ribosome. *Biochim Biophys Acta* **95**, 146-155 (1965).
- 19 29 Brogden, R. N., Carmine, A. A., Heel, R. C., Speight, T. M. & Avery, G. S.  
20 Trimethoprim: a review of its antibacterial activity, pharmacokinetics and  
21 therapeutic use in urinary tract infections. *Drugs* **23**, 405-430,  
22 doi:10.2165/00003495-198223060-00001 (1982).
- 23 30 Gullberg, E. *et al.* Selection of resistant bacteria at very low antibiotic  
24 concentrations. *PLoS Pathog* **7**, e1002158, doi:10.1371/journal.ppat.1002158  
25 (2011).
- 26 31 Andersson, D. I. & Hughes, D. Evolution of antibiotic resistance at non-lethal drug  
27 concentrations. *Drug Resist Updat* **15**, 162-172, doi:10.1016/j.drup.2012.03.005  
28 (2012).
- 29 32 Bjorkman, J. & Andersson, D. I. The cost of antibiotic resistance from a bacterial  
30 perspective. *Drug Resist Updat* **3**, 237-245, doi:10.1054/drup.2000.0147 (2000).
- 31 33 Crow, J. F. & Kimura, M. *An introduction to population genetics theory*. (Harper  
32 & Row, 1970).



- 1 34 Jost, L. Entropy and diversity. *Oikos* **113**, 363-375, doi:DOI 10.1111/j.2006.0030-  
2 1299.14714.x (2006).
- 3 35 Tuomisto, H. A diversity of beta diversities: straightening up a concept gone awry.  
4 Part 1. Defining beta diversity as a function of alpha and gamma diversity.  
5 *Ecography* **33**, 2-22, doi:10.1111/j.1600-0587.2009.05880.x (2010).
- 6 36 Bershtein, S., Choi, J. M., Bhattacharyya, S., Budnik, B. & Shakhnovich, E.  
7 Systems-level response to point mutations in a core metabolic enzyme modulates  
8 genotype-phenotype relationship. *Cell Rep* **11**, 645-656,  
9 doi:10.1016/j.celrep.2015.03.051 (2015).
- 10 37 de Visser, J. A. & Krug, J. Empirical fitness landscapes and the predictability of  
11 evolution. *Nat Rev Genet* **15**, 480-490, doi:10.1038/nrg3744 (2014).
- 12 38 Lobkovsky, A. E. & Koonin, E. V. Replaying the tape of life: quantification of the  
13 predictability of evolution. *Front Genet* **3**, 246, doi:10.3389/fgene.2012.00246  
14 (2012).
- 15 39 Toprak, E. *et al.* Evolutionary paths to antibiotic resistance under dynamically  
16 sustained drug selection. *Nat Genet* **44**, 101-105, doi:10.1038/ng.1034 (2011).
- 17 40 Barrett, R. D. & Schluter, D. Adaptation from standing genetic variation. *Trends*  
18 *Ecol Evol* **23**, 38-44, doi:10.1016/j.tree.2007.09.008 (2008).
- 19 41 Liu, A. *et al.* Selective advantage of resistant strains at trace levels of antibiotics: a  
20 simple and ultrasensitive color test for detection of antibiotics and genotoxic agents.  
21 *Antimicrob Agents Chemother* **55**, 1204-1210, doi:10.1128/AAC.01182-10 (2011).
- 22 42 Westhoff, S. *et al.* The evolution of no-cost resistance at sub-MIC concentrations  
23 of streptomycin in *Streptomyces coelicolor*. *ISME J* **11**, 1168-1178,  
24 doi:10.1038/ismej.2016.194 (2017).
- 25 43 McKown, R. L., Orle, K. A., Chen, T. & Craig, N. L. Sequence requirements of  
26 *Escherichia coli* attTn7, a specific site of transposon Tn7 insertion. *J Bacteriol* **170**,  
27 352-358 (1988).
- 28 44 Peters, J. E. & Craig, N. L. Tn7: smarter than we thought. *Nat Rev Mol Cell Biol* **2**,  
29 806-814, doi:10.1038/35099006 (2001).
- 30 45 Zhao, L., Liu, Z., Levy, S. F. & Wu, S. Bartender: a fast and accurate clustering  
31 algorithm to count barcode reads. *Bioinformatics* **34**, 739-747,  
32 doi:10.1093/bioinformatics/btx655 (2018).

- 1 46 Rényi, A. On measures of information and entropy. *Proceedings of the Fourth*  
2 *Berkeley Symposium on Mathematics, Statistics, and Probability*, 547-561. (1960).  
3 47 Jones E, O. E., Peterson P. SciPy: Open Source Scientific Tools for Python.  
4 <http://www.scipy.org/> **Version 0.18.0**. (2001).

5

6

## 7 **Acknowledgments**

8 We thank Lu Zhao, Jose Rojas Echenique, Sasha Levy, and Alberto Pascual Garcia for  
9 valuable discussions and advice, and Dan Tawfik and Amir Aharoni for insightful  
10 comments and help with preparation of the manuscript. MM was supported by an F32  
11 fellowship from the National Institutes of Health (GM116217) and an Ambizione grant  
12 from the Swiss National Science Foundation (PZ00P3\_180147). A.W.R.S. acknowledges  
13 support from the Canadian Natural Sciences and Engineering Research Council (NSERC  
14 RN000524). This work was supported by personal Israel Science Foundation grant 1630/15  
15 to SB.

16

## 17 **Authors Contribution**

18 S.B. conceived the study. J.L. and W.J. performed the laboratory experiments. M.M.  
19 analyzed sequence data and applied ecological tools. S.B., M.M., A.W.R.S., L.G., analyzed  
20 the data. S.B. and M.M. wrote the manuscript. All authors approved of the final manuscript.

21

## Supplementary Figures

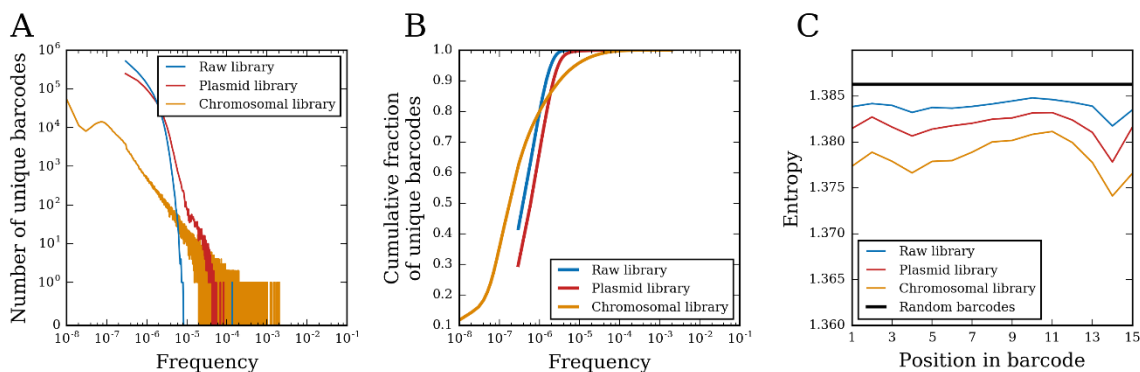

**Figure S1: Statistics of the initial barcode libraries.** (A) Distributions of barcode frequencies at different stages of library preparation. For a given frequency on the horizontal axis, the vertical axis shows the number of unique detected barcodes with that frequency. ‘Raw library’ (blue): NextSeq Illumina sequencing of the barcode library as synthesized by IDT (prior to plasmid library creation). ‘Plasmid library’ (red): MiSeq Illumina sequencing of barcodes incorporated into the Tn7 integration plasmid library. ‘Chromosomal library’ (orange): NextSeq Illumina sequencing of the barcode library integrated into *E. coli* chromosomes and generated by PCR performed on chromosomal DNA pooled from five independent extractions. (B) Same as panel (A), but showing the cumulative distributions of frequencies. (C) Shannon entropy of nucleotides at each position in the 15 nt barcode for the same libraries in panel (A). The horizontal black line marks the entropy ( $\ln 4 \approx 1.386$ ) for a truly random library of barcodes, where all nucleotides are equally abundant at each position.

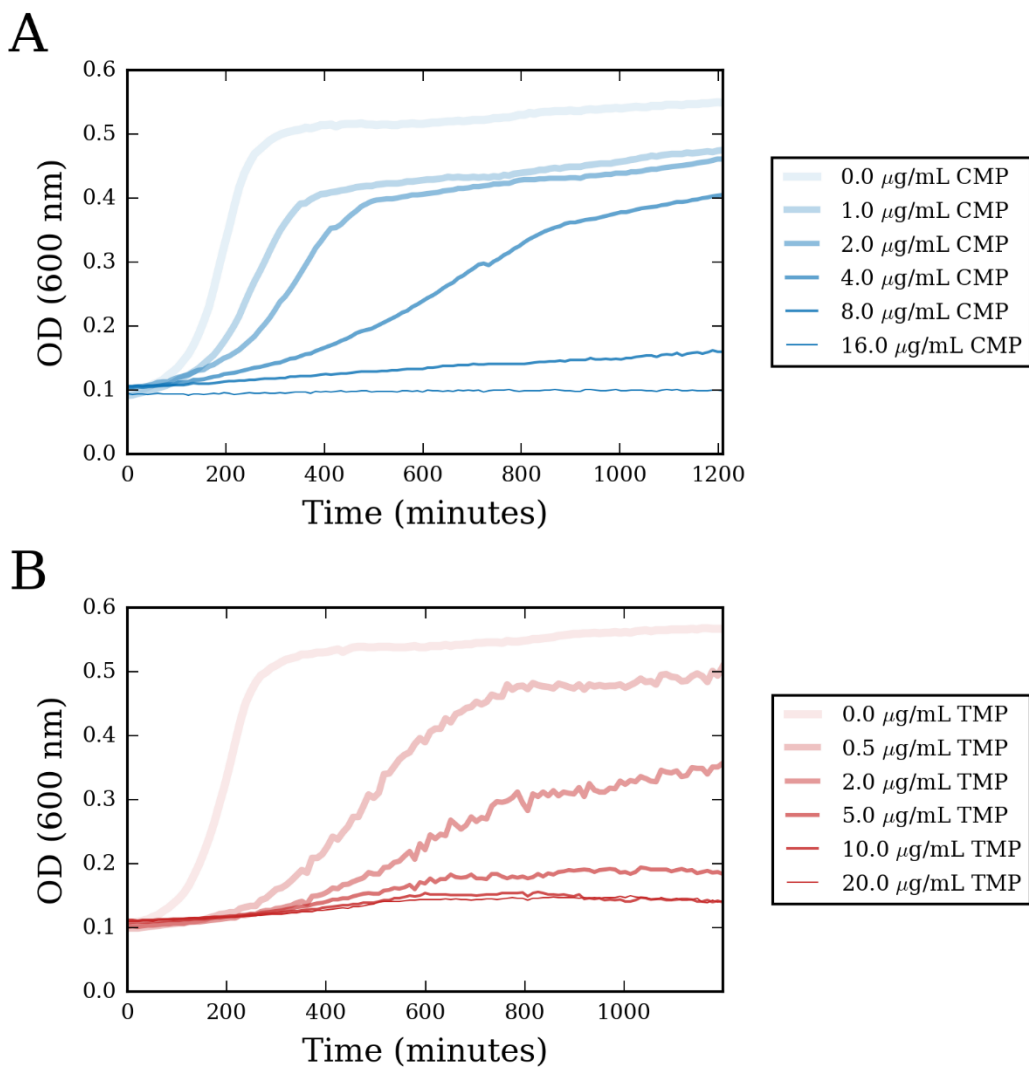

**Figure S2: MIC values of the naïve barcoded population.** We grew the naïve barcoded population for 20 hours in the presence of (A) 0-16  $\mu\text{g/ml}$  of chloramphenicol (CMP) or (B) 0-20  $\mu\text{g/ml}$  of trimethoprim (TMP). We defined the MIC for each drug as the lowest concentration of antibiotic at which we observed no growth.

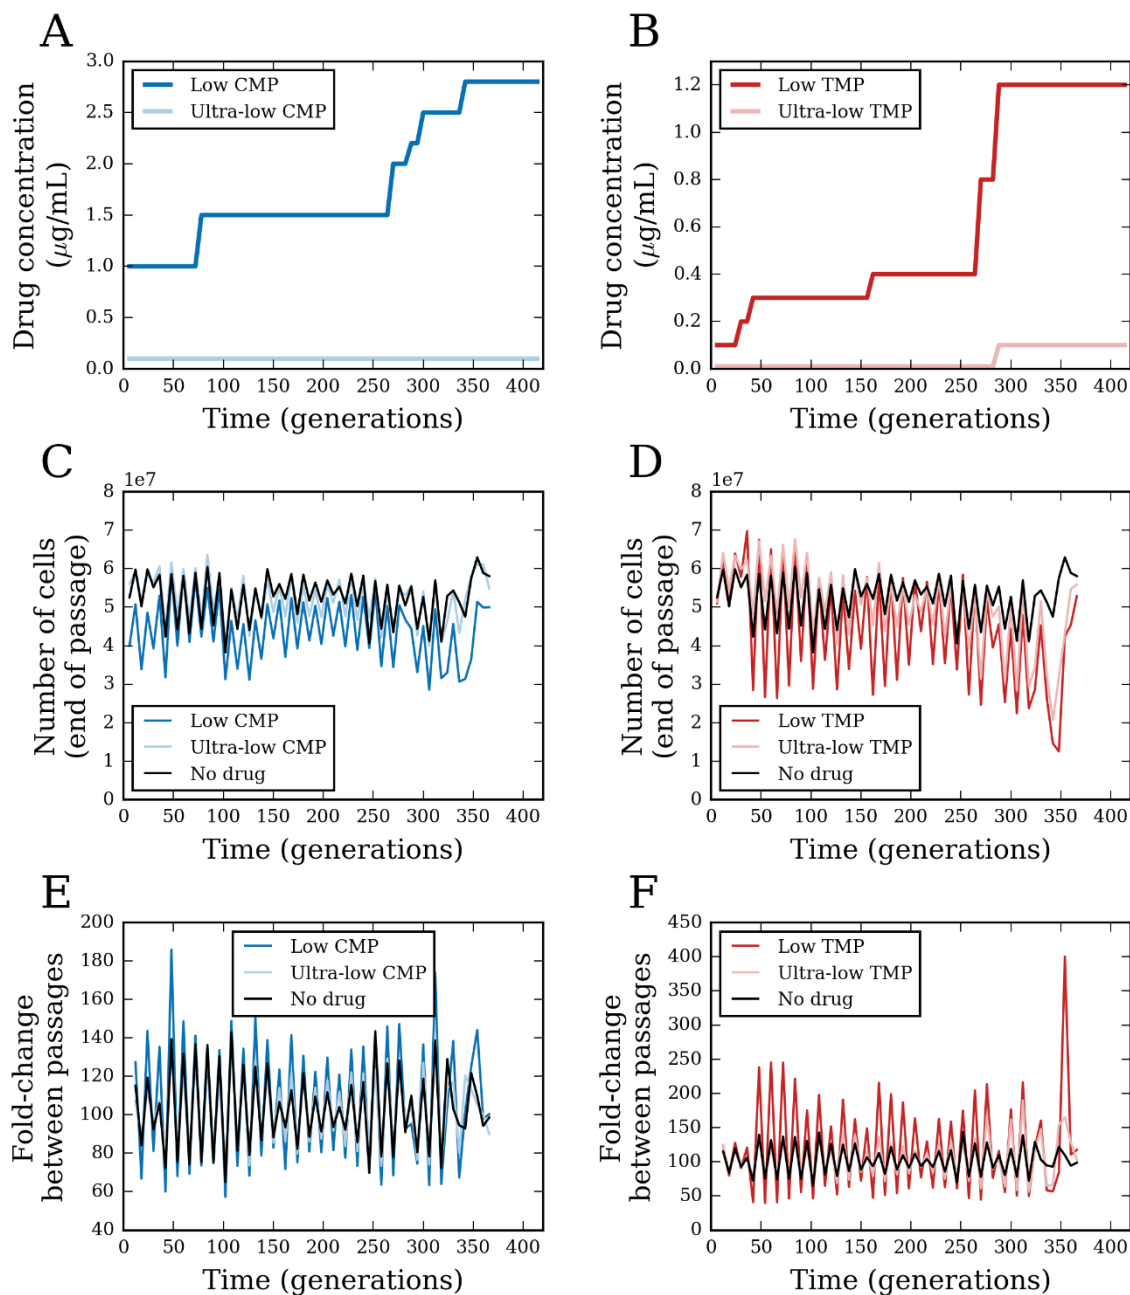

**Figure S3: Drug concentrations and population growth over evolution experiment.** (A) Trajectories of ‘low’ and ‘ultra-low’ chloramphenicol (CMP) concentrations over time of the evolution experiment. (B) Same as (A) but for trimethoprim (TMP) conditions. (C) Approximate number of cells at the end of each passage for ‘low’ and ‘ultra-low’ CMP conditions, along with the populations evolved without drug. Lines are averages over all 14 replicate populations for each condition. (D) Same as (C) but for TMP conditions. (E) Same as (C) but showing the fold-change of population size during each passage on the vertical axis. (F) Same as (E) but for TMP conditions. Periodic oscillations in cell numbers and yields result from the fact that cultures were propagated in two intermittent growth regimes: 9 hours during the day, followed by 12 hours during the night (see **Methods**).

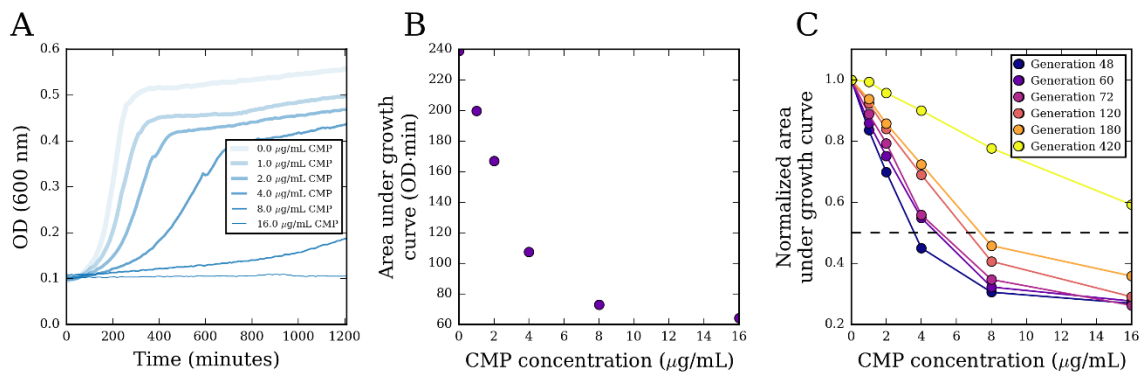

**Figure S4: Example of IC<sub>50</sub> calculation.** (A) Growth curves of cells from a barcoded population evolving in ‘low’ chloramphenicol (CMP) at generation 120 (passage 8), measured with different concentrations of CMP. (B) For each growth curve in (A), we calculate the area under it and plot the area as a function of CMP concentration. (C) We similarly calculate growth curve areas for generations 48, 60, 72, 180, and 420 and normalize them by the area of the growth curve with zero CMP. The IC<sub>50</sub> is then defined as the antibiotic concentration leading to 50% of growth relative to growth at zero CMP.

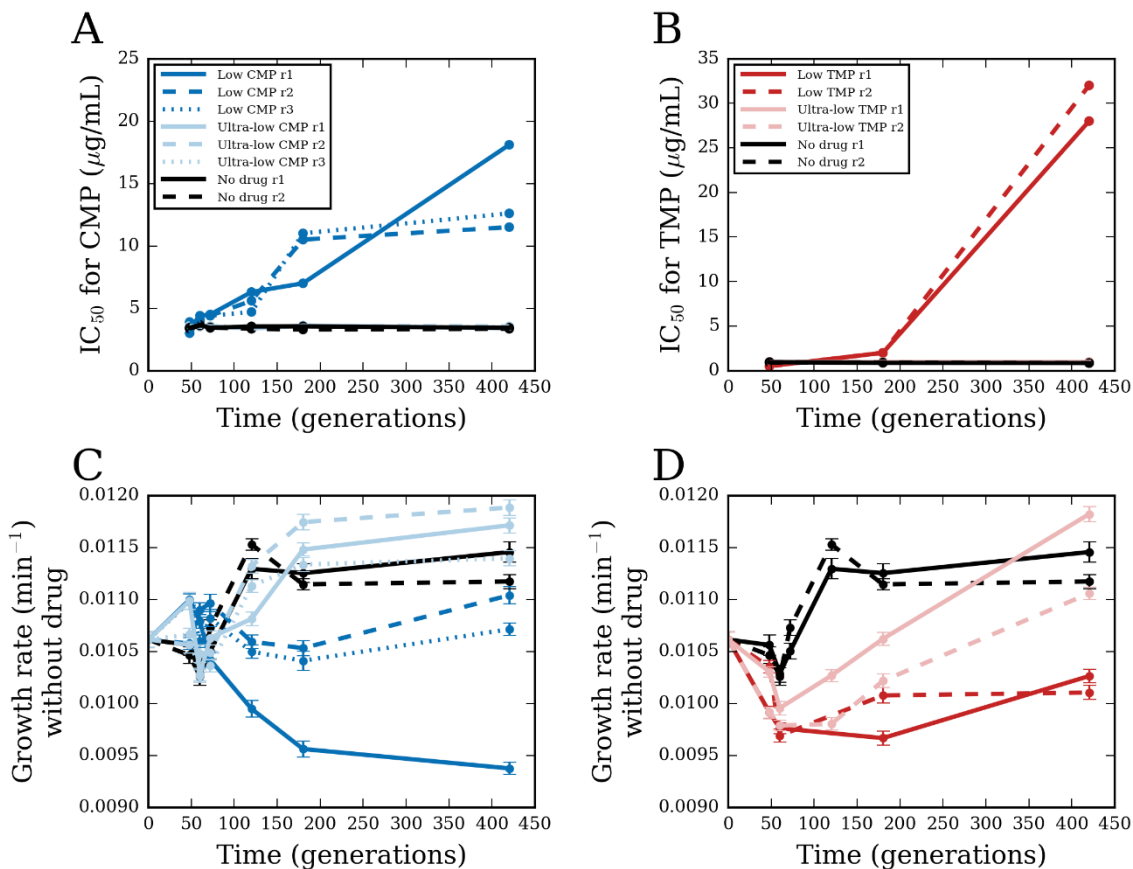

**Figure S5: Fitness of the evolved populations.** (A) Chloramphenicol (CMP) concentration inhibiting 50% of growth (IC<sub>50</sub>) of the barcoded populations evolving in ‘low’ and ‘ultra-low’ CMP as well as without drug. (B) Same as (A) but for trimethoprim (TMP). (C) Growth rate, measured in the absence of drug, of barcoded populations evolving in ‘low’ and ‘ultra-low’ CMP as well as without drug. Points represent the mean and error bars represent standard deviation over replicate measurements. (D) Same as (C) but for populations evolved in ‘low’ and ‘ultra-low’ TMP.

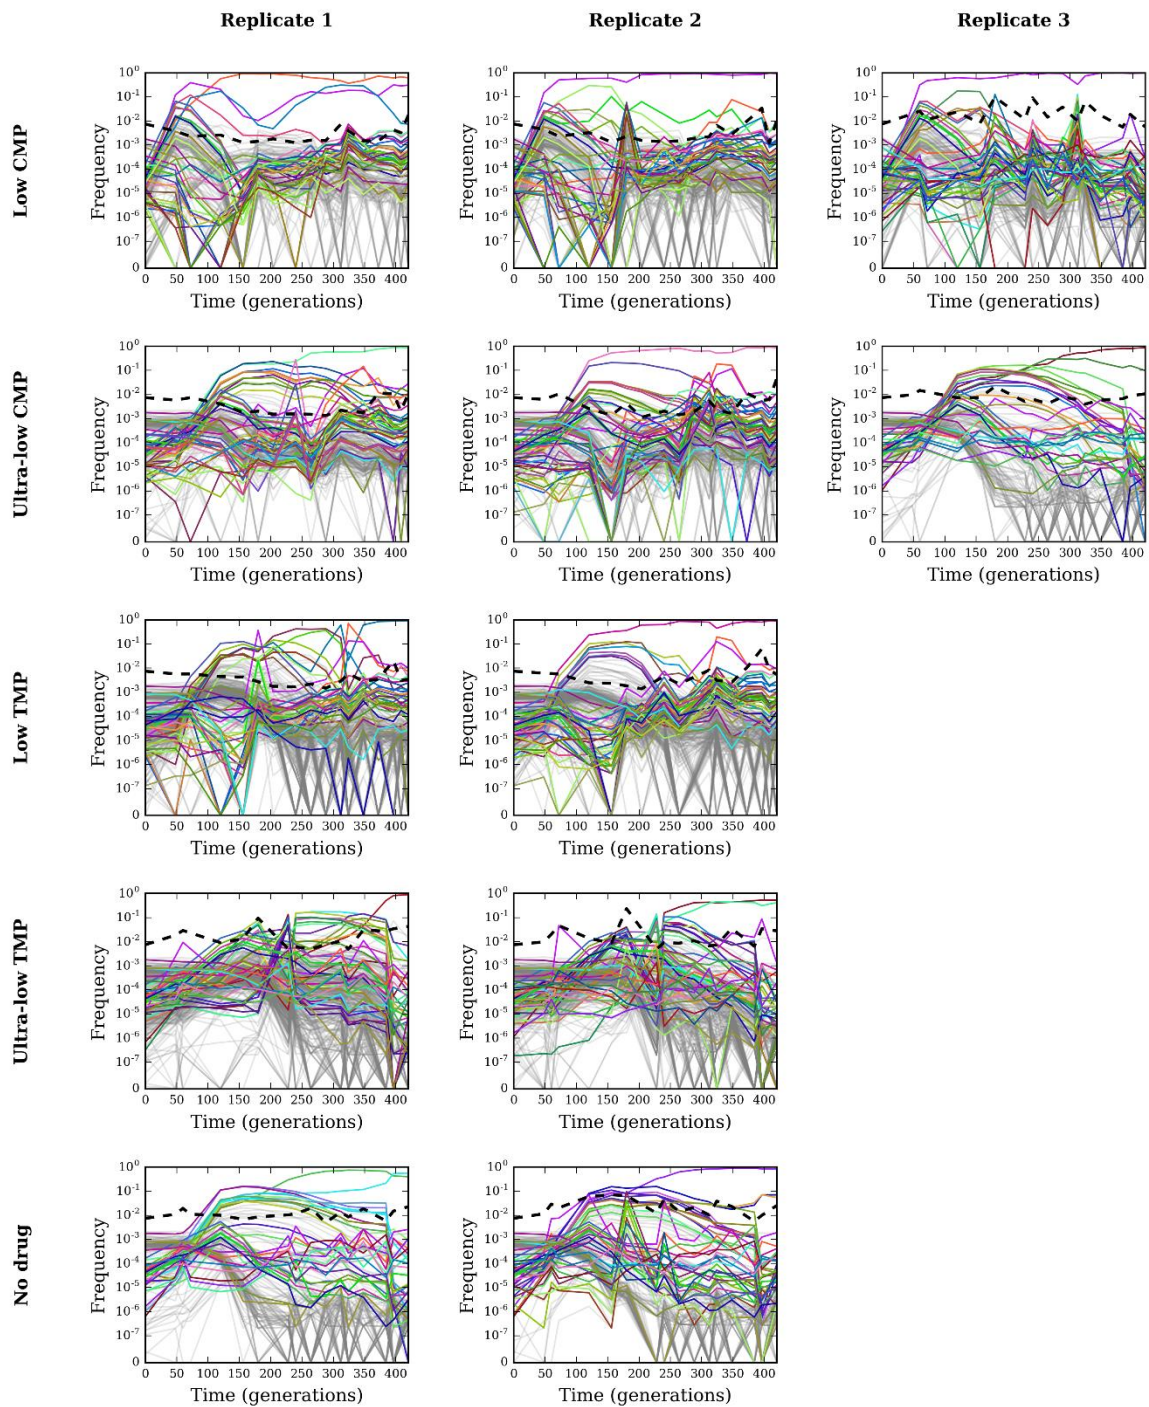

**Figure S6: Trajectories of barcoded lineage frequencies.** Frequency trajectories for barcodes with average frequency greater than  $10^{-4}$ . Each row corresponds to a different condition and each column corresponds to a different replicate. Lineages that rank in the top 10 (according to average frequency) in any population are colored in all panels (Table S2); the colors are consistent across panels and match Fig. 2. Lineages that do not rank in the top 10 for any population are in gray and made transparent to show their density. The dashed black line shows the frequency of reads without identified barcodes.



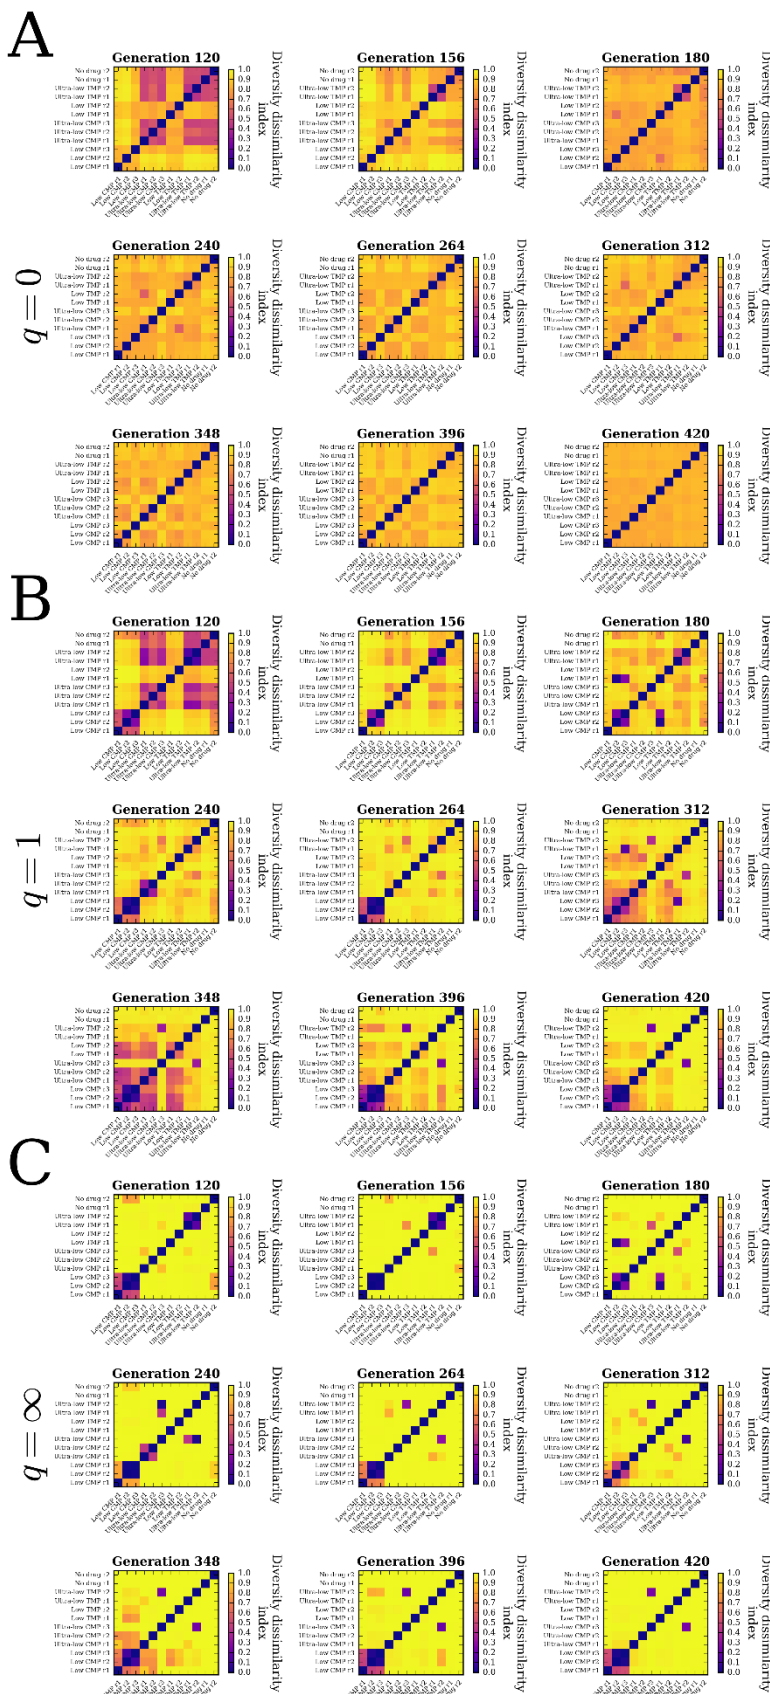

**Figure S7: Dissimilarity of lineage frequencies between populations.** Each panel shows the diversity dissimilarity index (Eq. 2, Methods) between all pairs of populations at a particular time point: (A)  $q = 0$ , (B)  $q = 1$ , (C)  $q = \infty$ .

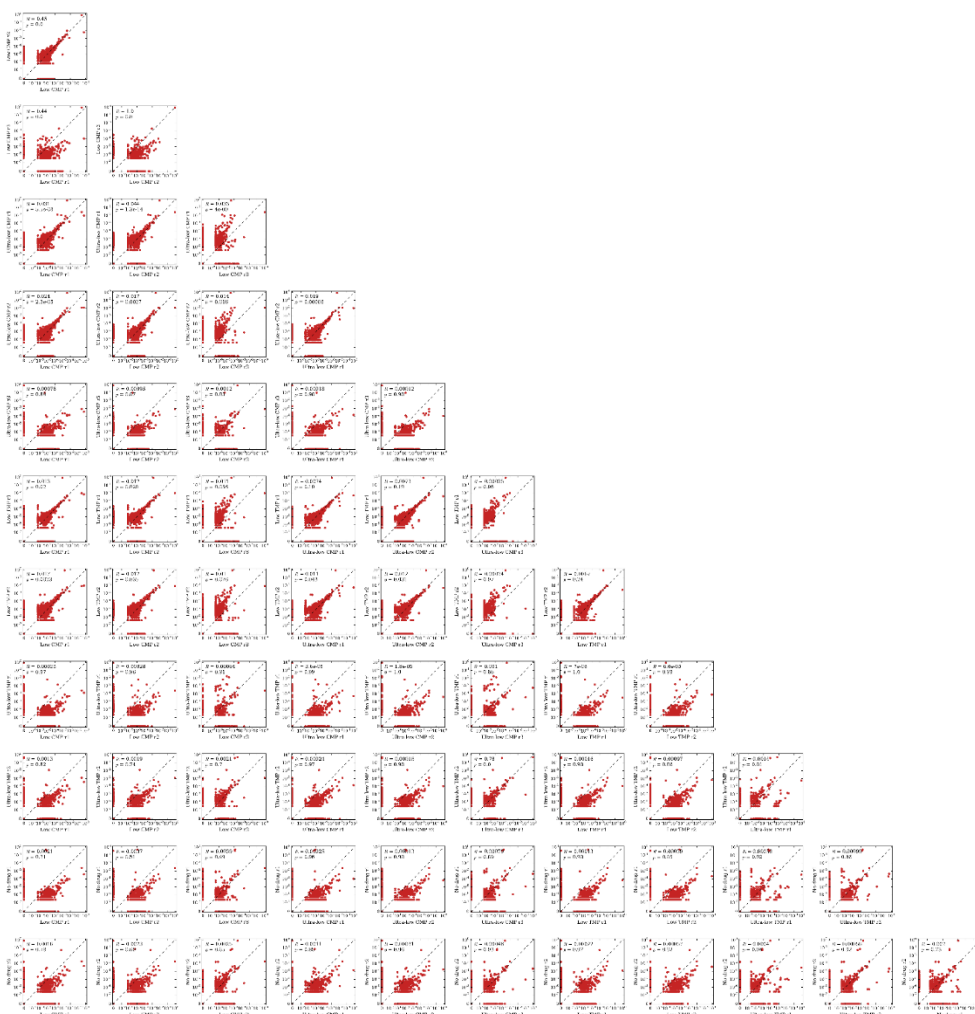

**Figure S8: Correlation of lineage frequencies between populations.** Scatter plots comparing lineage frequencies at the end of the experiment between each pair of populations. Each point represents a unique barcoded lineage; the dashed line is the line of identity.

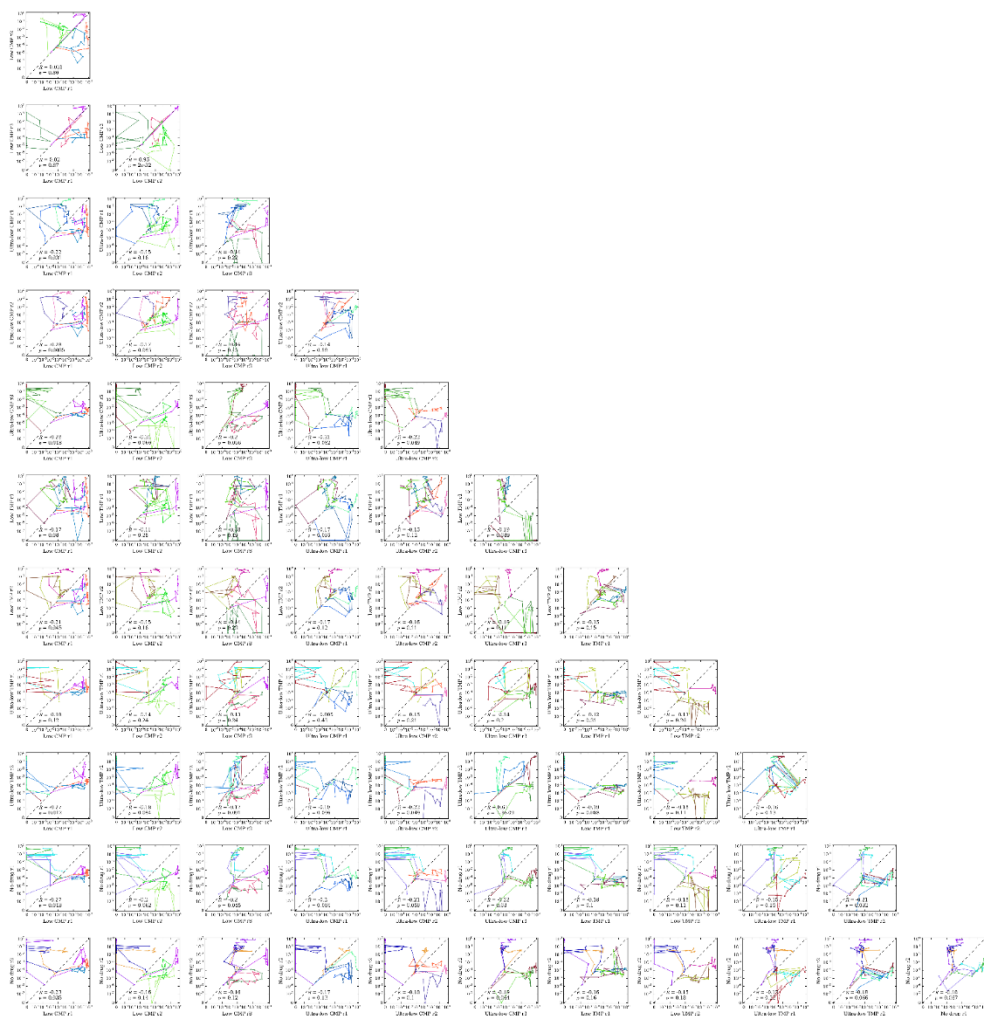

**Figure S9: Correlation of top lineage trajectories between populations.** Plots show traces of the top three (by average frequency) lineages over time between each pair of populations. Colors of lineages are consistent across panels and match **Fig. 2**. The dashed line is the line of identity.

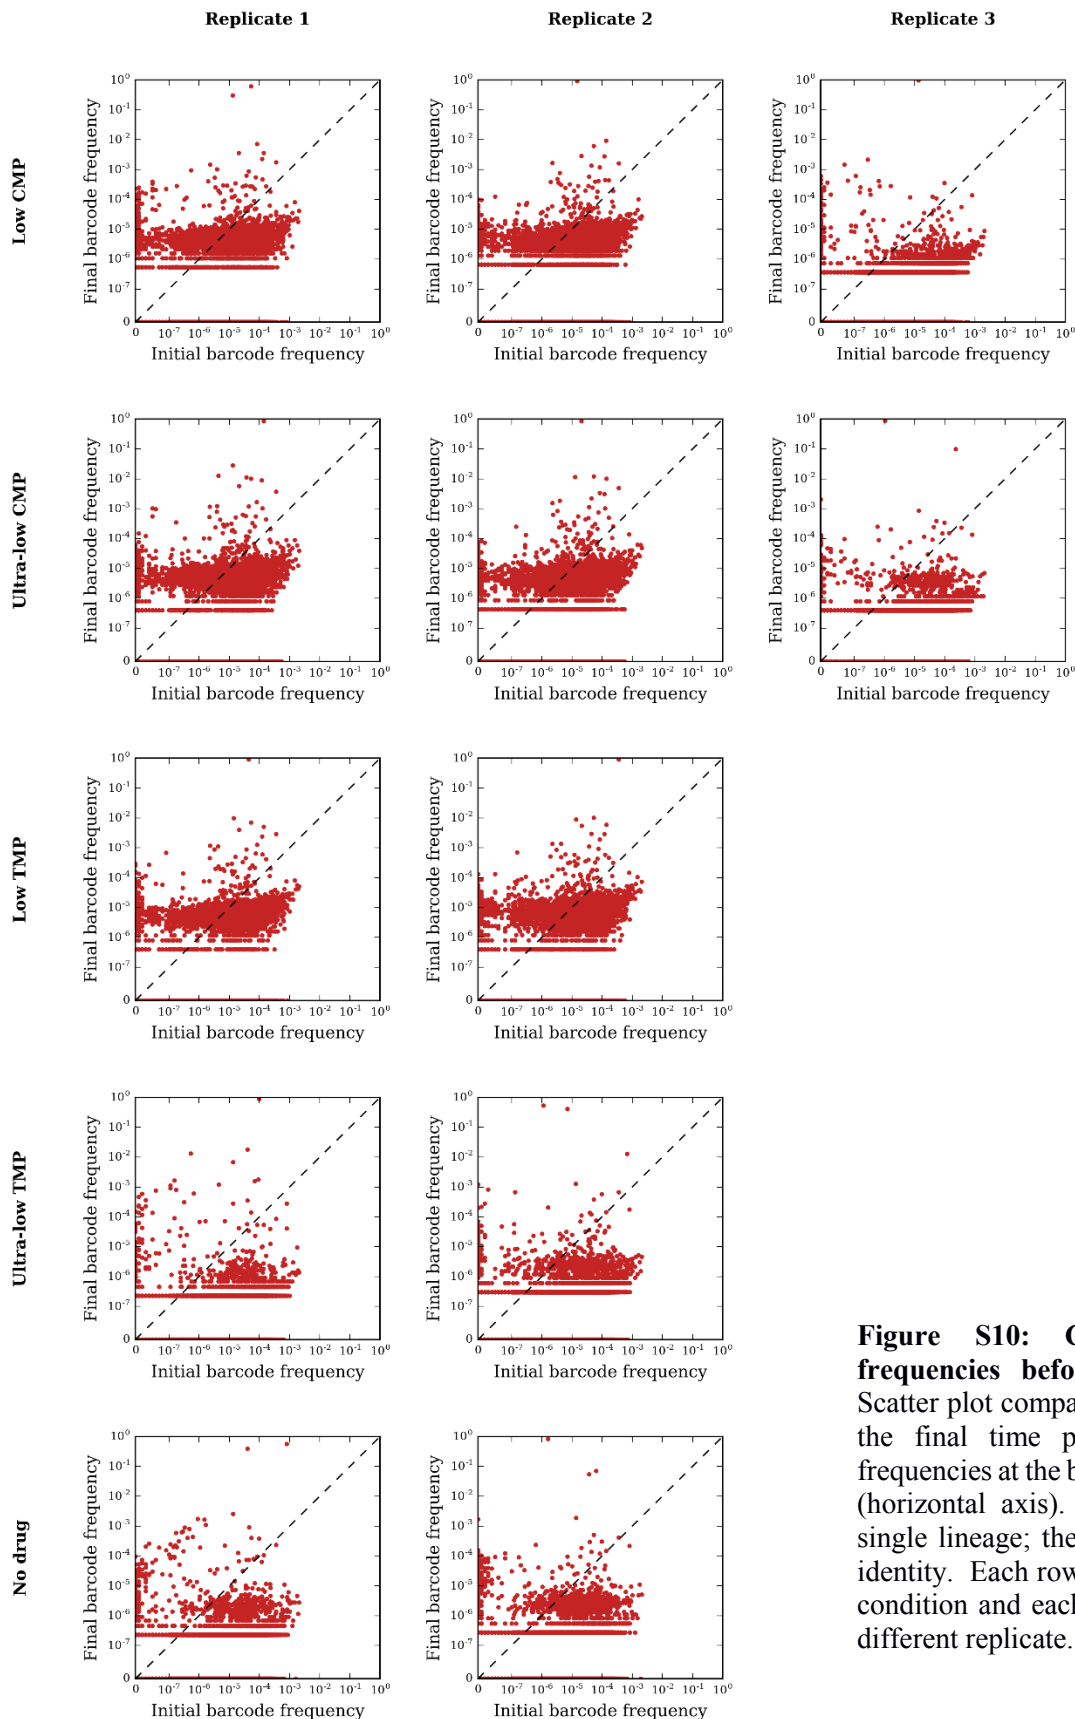

**Figure S10: Correlation of lineage frequencies before and after evolution.** Scatter plot comparing lineage frequencies at the final time point (vertical axis) with frequencies at the beginning of the experiment (horizontal axis). Each point represents a single lineage; the dashed line is the line of identity. Each row corresponds to a different condition and each column corresponds to a different replicate.

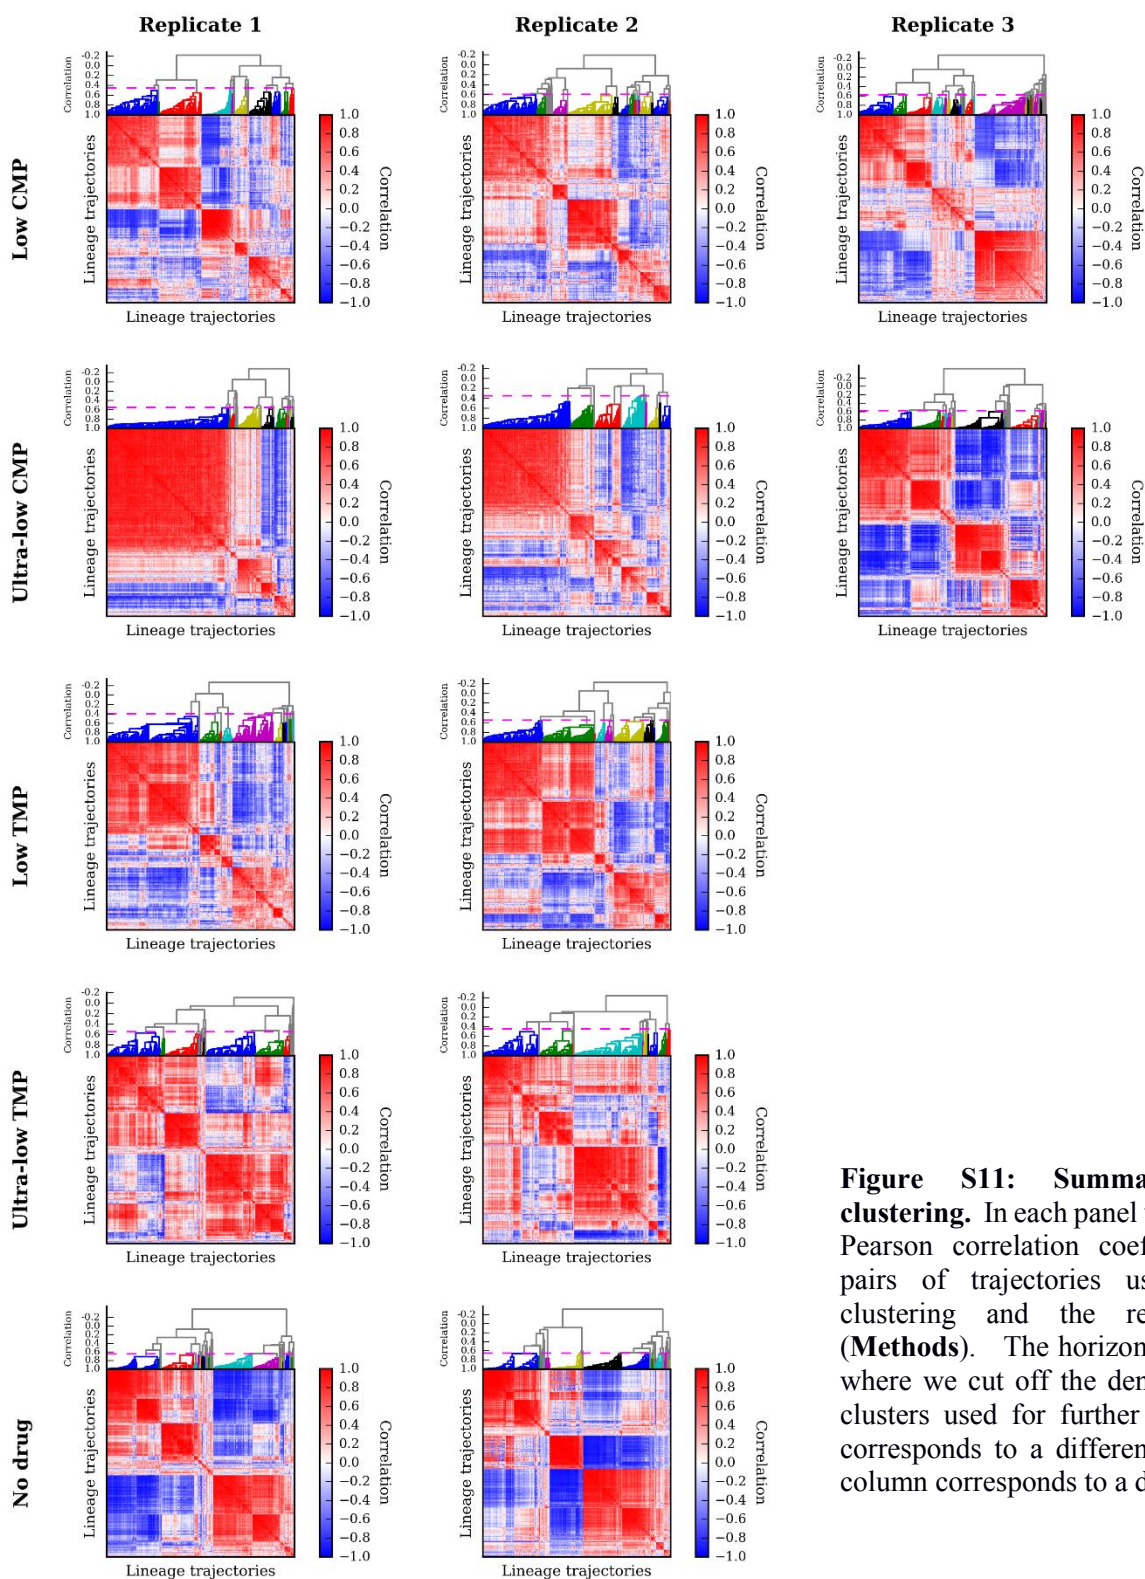

**Figure S11: Summary of trajectory clustering.** In each panel we show the matrix of Pearson correlation coefficients between all pairs of trajectories used for hierarchical clustering and the resulting dendrogram (**Methods**). The horizontal dashed line marks where we cut off the dendrogram to form flat clusters used for further analysis. Each row corresponds to a different condition and each column corresponds to a different replicate.

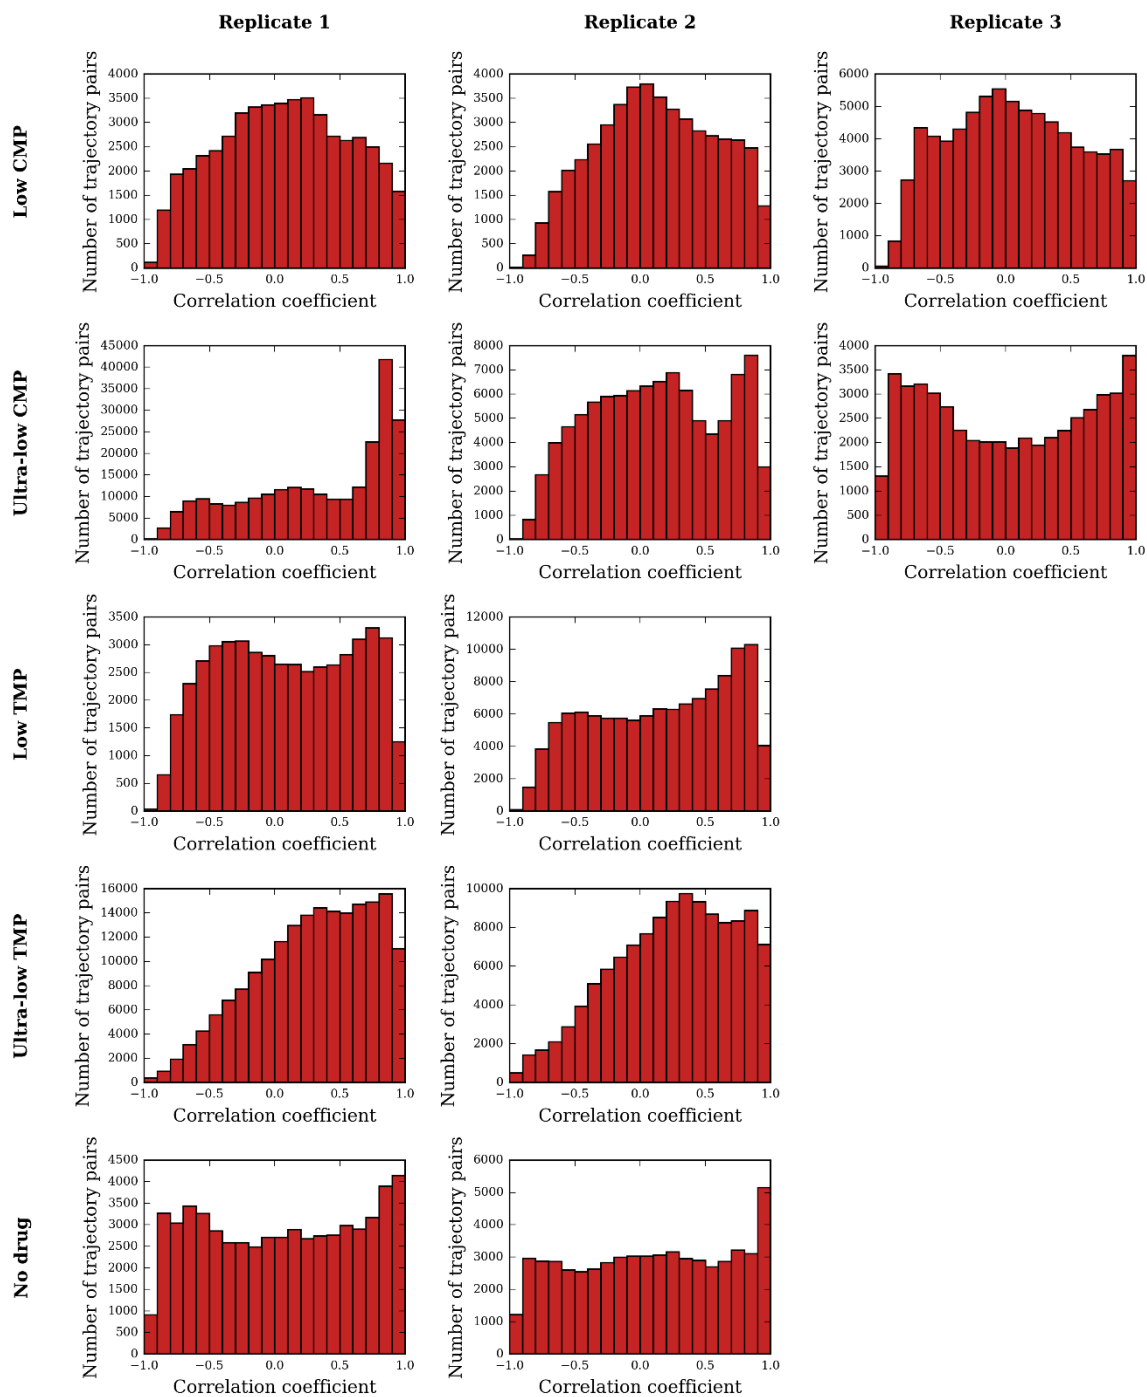

**Figure S12: Distributions of trajectory correlations.** In each panel we show the histogram of Pearson correlation coefficients between all pairs of lineage trajectories used for hierarchical clustering population (see **Methods**). Each column corresponds to a different condition and each row corresponds to a different replicate.

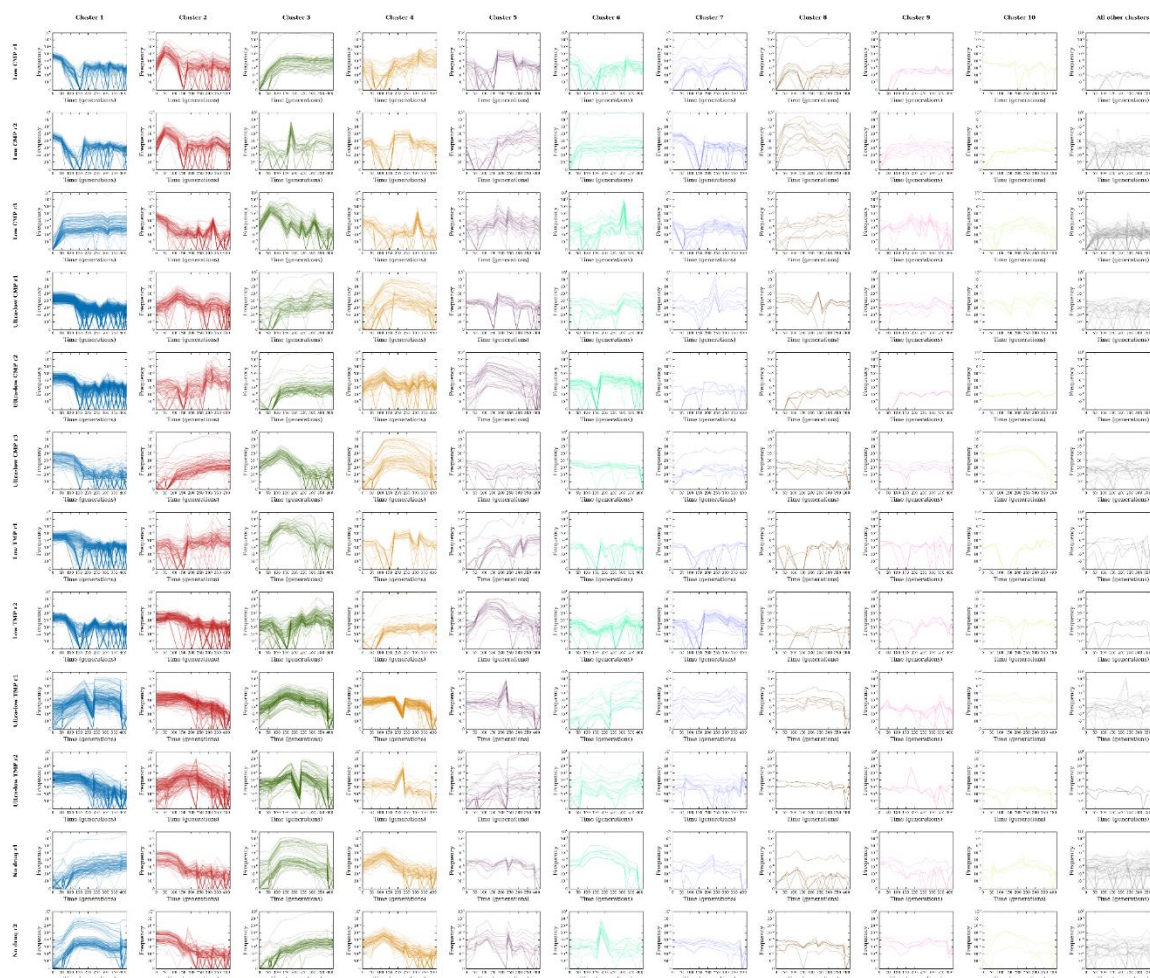

**Figure S13: Clusters of lineage trajectories.** Each panel shows a set of lineage trajectories that clustered together in our analysis. Each row corresponds to a single population. The first 10 columns show the top 10 clusters in decreasing order of cluster size (number of trajectories), while the last column shows trajectories from all other clusters.

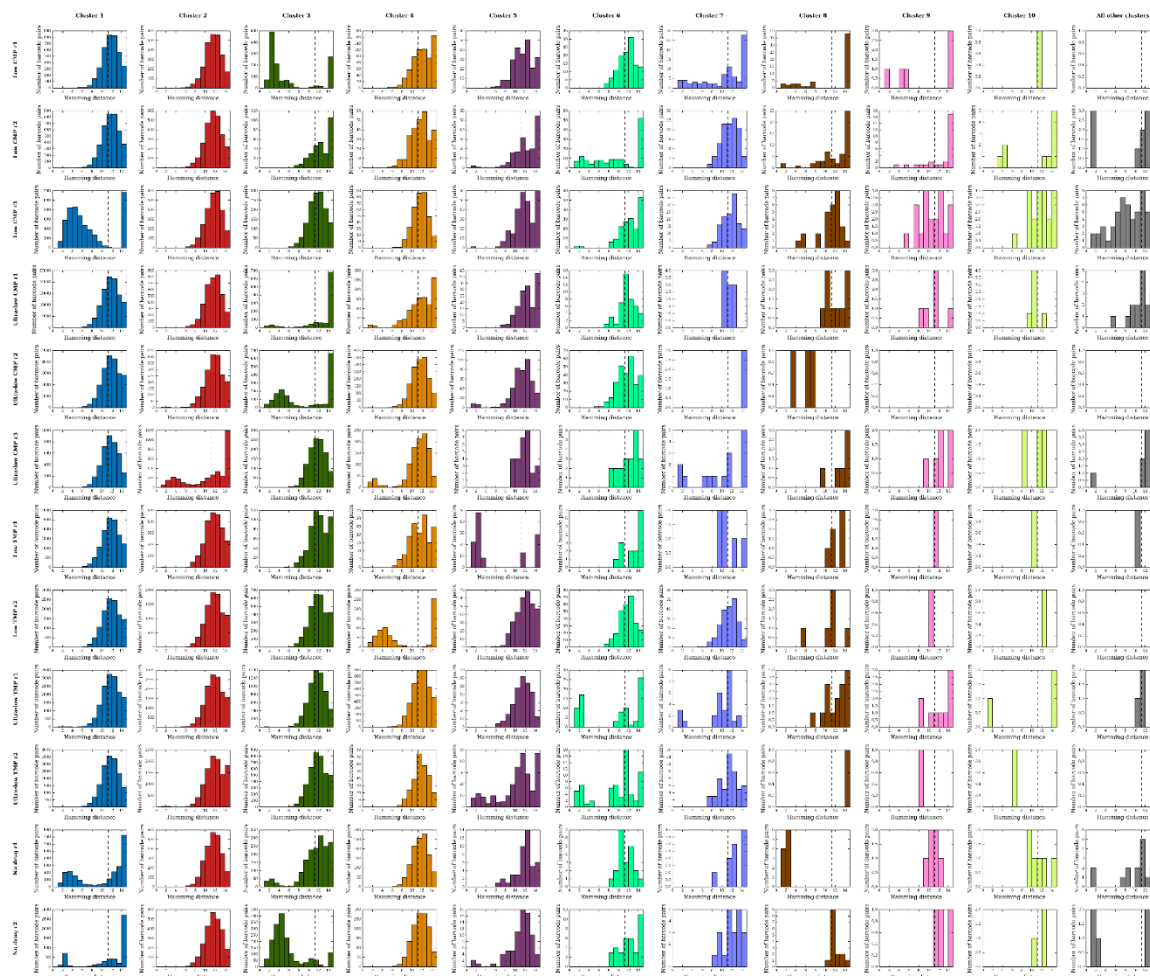

**Figure S14: Hamming distances among sequences within trajectory clusters.** Each panel shows the histogram of Hamming distances between all pairs of barcode sequences whose trajectories clustered together in our analysis. The first 10 columns show the top 10 clusters in decreasing order of cluster size (number of trajectories), while the last column shows trajectories from all other clusters. The vertical dashed line marks the expected Hamming distance between two random barcode sequences (11.25). Empty histograms correspond to clusters with only one trajectory.
